# Supplementary material for: Molecular insight into arsenic toxicity via the genome-wide deletion mutant screening of Saccharomyces cerevisiae
Source: Royal Society of Chemistry journal article supplement (doi:10.1039/c5mt00261c), 2015-12-02
Supplement: c5mt00261c1.xlsx [file c5mt00261c1.xlsx]

## Sheet: Sheet1
ORF	H2O		As 0.2 mM		As 0.4 mM
	T0	T16	T0	T16	T0	T16
BY4743 Average (n=128)	0.0418889	0.900905	0.0411984	0.740437	0.0419603	0.400476
YAL002W	0.039	0.692	0.038	0.318	0.039	0.352
YAL004W	0.041	0.96	0.037	0.728	0.042	0.71
YAL005C	0.04	0.921	0.038	0.648	0.039	0.657
YAL007C	0.042	1.047	0.037	0.689	0.043	0.661
YAL008W	0.042	1.006	0.039	0.691	0.041	0.741
YAL009W	0.041	0.741	0.04	0.494	0.042	0.561
YAL010C	0.04	0.092	0.039	0.057	0.043	0.087
YAL011W	0.043	0.97	0.039	0.303	0.043	0.247
YAL012W	0.05	0.33	0.043	0.08	0.047	0.05
YAL013W	0.042	0.565	0.043	0.33	0.046	0.217
YAL014C	0.042	0.993	0.04	0.685	0.048	0.652
YAL015C	0.046	0.871	0.041	0.643	0.046	0.431
YAL016c-B	0.039	0.045	0.038	0.055	0.039	0.076
YAL016W	0.042	0.043	0.037	0.041	0.04	0.041
YAL017W	0.048	1.002	0.04	0.635	0.048	0.684
YAL018C	0.044	1.007	0.041	0.733	0.046	0.731
YAL019W	0.043	0.825	0.041	0.51	0.045	0.47
YAL020C	0.045	0.764	0.042	0.407	0.046	0.696
YAL021C	0.0485	0.5045	0.046	0.2095	0.049	0.246
YAL022C	0.045	1.01	0.042	0.695	0.046	0.818
YAL023C	0.053	0.893	0.045	0.675	0.049	0.72
YAL024C	0.042	0.612	0.047	0.092	0.042	0.054
YAL026C	0.039	0.809	0.038	0.638	0.041	0.586
YAL027W	0.047	1.043	0.039	0.863	0.041	0.671
YAL028W	0.053	1.037	0.037	0.786	0.046	0.828
YAL029C	0.04	0.942	0.036	0.451	0.038	0.507
YAL030W	0.037	0.911	0.036	0.663	0.039	0.697
YAL031C	0.045	1.058	0.036	0.667	0.039	0.705
YAL034C	0.038	0.995	0.038	0.71	0.039	0.764
YAL035W	0.038	0.094	0.042	0.071	0.044	0.086
YAL036C	0.042	1.009	0.04	0.92	0.048	0.752
YAL037c-A	0.039	0.042	0.038	0.042	0.036	0.04
YAL037W	0.04	1.026	0.038	0.755	0.041	0.647
YAL039C	0.044	0.905	0.038	0.335	0.041	0.517
YAL040C	0.042	0.973	0.037	0.526	0.042	0.699
YAL042W	0.048	1.067	0.039	0.797	0.046	0.922
YAL043C-a	0.042	0.983	0.038	0.693	0.042	0.863
YAL044C	0.044	0.991	0.039	0.746	0.045	0.818
YAL044w-A	0.047	0.915	0.042	0.82	0.044	0.595
YAL045C	0.042	1.029	0.038	0.826	0.044	0.827
YAL046C	0.047	1.042	0.041	0.911	0.046	0.772
YAL047C	0.044	0.165	0.044	0.141	0.046	0.082
YAL048C	0.045	1.022	0.038	0.7	0.04	0.632
YAL049C	0.0405	0.938	0.042	0.775	0.041	0.6495
YAL051W	0.04	1.047	0.036	0.725	0.038	0.758
YAL053W	0.041	1.047	0.037	0.73	0.038	0.766
YAL054C	0.046	0.909	0.041	0.755	0.048	0.596
YAL055W	0.041	0.99	0.037	0.667	0.037	0.618
YAL056W	0.043	0.951	0.038	0.756	0.038	0.687
YAL058C-A	0.043	0.868	0.037	0.511	0.046	0.462
YAL058W	0.045	1.053	0.039	0.733	0.04	0.827
YAL059W	0.041	0.905	0.042	0.759	0.045	0.816
YAL060W	0.039	1.037	0.038	0.782	0.041	0.729
YAL061W	0.041	1.057	0.039	0.878	0.046	0.955
YAL062W	0.042	1.04	0.037	0.828	0.042	0.844
YAL064C-A	0.042	0.893	0.045	0.845	0.046	0.762
YAL065C	0.041	1.034	0.038	0.968	0.046	0.894
YAL066W	0.042	1.026	0.04	0.972	0.045	1.031
YAL067C	0.045	1.031	0.041	0.851	0.045	0.927
YAL067w-A	0.042	0.87	0.042	0.778	0.045	0.432
YAL068C	0.048	1.036	0.038	0.86	0.047	0.967
YAR002C-A	0.043	0.765	0.045	0.811	0.045	0.566
YAR002W	0.039	0.73	0.037	0.384	0.043	0.526
YAR003W	0.038	0.755	0.038	0.569	0.041	0.479
YAR014C	0.037	0.746	0.036	0.41	0.04	0.534
YAR015W	0.038	0.906	0.036	0.713	0.039	0.734
YAR018C	0.041	0.912	0.037	0.584	0.041	0.567
YAR020C	0.039	0.992	0.036	0.681	0.038	0.603
YAR023C	0.041	0.985	0.036	0.835	0.038	0.62
YAR027W	0.04	0.875	0.037	0.831	0.045	0.719
YAR028W	0.037	0.887	0.039	0.899	0.043	0.837
YAR029W	0.043	1.06	0.04	0.924	0.05	0.82
YAR030C	0.041	0.996	0.04	0.869	0.048	0.852
YAR031W	0.041	1.053	0.04	0.978	0.052	0.945
YAR035c-A	0.041	0.867	0.04	0.572	0.045	0.283
YAR035W	0.04	1.015	0.039	0.784	0.046	0.846
YAR037W	0.041	1.016	0.038	0.853	0.044	0.849
YAR040C	0.045	1.079	0.04	0.873	0.046	0.859
YAR042W	0.041	0.9575	0.0405	0.851	0.044	0.5975
YAR043C	0.041	1.065	0.041	0.84	0.043	0.793
YAR044W	0.042	1.015	0.038	0.821	0.042	0.663
YAR047C	0.041	1.031	0.038	0.861	0.045	0.851
YAR050W	0.047	0.93	0.038	0.729	0.044	0.097
YBL001C	0.046	0.859	0.054	0.885	0.045	0.322
YBL002W	0.042	0.814	0.051	0.808	0.043	0.186
YBL003C	0.042	0.808	0.049	0.82	0.045	0.203
YBL005W	0.042	0.839	0.046	0.802	0.045	0.289
YBL006C	0.044	0.271	0.044	0.171	0.044	0.057
YBL007C	0.046	0.106	0.045	0.08	0.044	0.06
YBL008W	0.047	0.837	0.049	0.722	0.044	0.226
YBL008w-A	0.04	0.844	0.045	0.874	0.045	0.579
YBL009W	0.048	0.863	0.046	0.704	0.048	0.299
YBL010C	0.048	0.919	0.048	0.841	0.047	0.365
YBL011W	0.044	0.77	0.042	0.693	0.041	0.15
YBL012C	0.04	0.721	0.04	0.644	0.04	0.127
YBL013W	0.04	0.739	0.039	0.507	0.039	0.103
YBL015W	0.04	0.762	0.042	0.519	0.039	0.129
YBL017C	0.039	0.737	0.041	0.65	0.04	0.247
YBL019W	0.039	0.721	0.04	0.687	0.043	0.218
YBL021C	0.039	0.712	0.041	0.546	0.041	0.186
YBL022C	0.045	0.695	0.042	0.393	0.045	0.111
YBL024W	0.04	0.43	0.044	0.099	0.041	0.044
YBL027W	0.04	0.098	0.043	0.125	0.042	0.094
YBL028C	0.042	0.786	0.043	0.611	0.041	0.205
YBL029c-A	0.039	0.849	0.043	0.853	0.045	0.601
YBL029W	0.047	0.808	0.043	0.712	0.043	0.265
YBL031W	0.044	0.491	0.044	0.156	0.042	0.052
YBL032W	0.041	0.548	0.043	0.401	0.041	0.155
YBL033C	0.04	0.041	0.041	0.041	0.045	0.042
YBL036C	0.04	0.79	0.039	0.698	0.041	0.174
YBL037W	0.04	0.659	0.038	0.391	0.04	0.125
YBL038W	0.039	0.055	0.038	0.058	0.04	0.053
YBL039C	0.04	0.217	0.038	0.219	0.04	0.092
YBL039w-A	0.041	0.84	0.042	0.896	0.045	0.616
YBL042C	0.04	0.567	0.038	0.324	0.038	0.109
YBL043W	0.04	0.629	0.039	0.405	0.039	0.123
YBL044W	0.04	0.668	0.04	0.326	0.04	0.147
YBL045C	0.039	0.219	0.039	0.161	0.04	0.065
YBL046W	0.04	0.578	0.038	0.208	0.04	0.068
YBL047C	0.054	0.688	0.048	0.245	0.056	0.178
YBL048W	0.05	0.806	0.049	0.691	0.053	0.237
YBL049W	0.048	0.611	0.047	0.379	0.049	0.119
YBL051C	0.048	0.149	0.047	0.148	0.062	0.079
YBL052C	0.049	0.812	0.047	0.615	0.051	0.298
YBL053W	0.047	0.8	0.048	0.69	0.05	0.275
YBL054W	0.047	0.642	0.046	0.625	0.048	0.226
YBL055C	0.047	0.62	0.046	0.456	0.048	0.154
YBL056W	0.046	0.413	0.044	0.347	0.049	0.176
YBL057C	0.046	0.596	0.043	0.335	0.05	0.134
YBL058W	0.044	0.067	0.046	0.052	0.047	0.05
YBL059W	0.044	0.793	0.043	0.701	0.044	0.156
YBL060W	0.044	0.697	0.042	0.367	0.043	0.157
YBL061C	0.042	0.658	0.042	0.228	0.041	0.072
YBL062W	0.042	0.597	0.04	0.21	0.041	0.068
YBL063W	0.043	0.754	0.042	0.388	0.042	0.223
YBL064C	0.043	0.734	0.042	0.4	0.041	0.152
YBL065W	0.042	0.699	0.043	0.556	0.042	0.204
YBL066C	0.043	0.744	0.042	0.56	0.043	0.205
YBL067C	0.043	0.322	0.042	0.27	0.042	0.141
YBL068W	0.044	0.823	0.043	0.335	0.041	0.197
YBL069W	0.041	0.733	0.042	0.349	0.042	0.179
YBL070C	0.042	0.781	0.041	0.479	0.041	0.262
YBL071C	0.04	0.55	0.042	0.319	0.041	0.201
YBL071c-B	0.042	0.876	0.048	0.917	0.045	0.609
YBL071w-A	0.039	0.828	0.041	0.878	0.039	0.362
YBL072C	0.04	0.328	0.041	0.394	0.043	0.314
YBL075C	0.042	0.777	0.039	0.616	0.041	0.249
YBL078C	0.039	0.663	0.039	0.442	0.041	0.224
YBL079W	0.039	0.233	0.039	0.223	0.04	0.089
YBL080C	0.04	0.235	0.04	0.224	0.039	0.083
YBL081W	0.039	0.475	0.04	0.347	0.04	0.214
YBL082C	0.04	0.72	0.045	0.358	0.043	0.264
YBL083C	0.045	0.669	0.041	0.357	0.045	0.1
YBL085W	0.043	0.834	0.04	0.661	0.042	0.266
YBL086C	0.042	0.791	0.039	0.637	0.042	0.288
YBL087C	0.043	0.572	0.039	0.278	0.043	0.269
YBL088C	0.043	0.829	0.04	0.624	0.042	0.3
YBL089W	0.043	0.375	0.039	0.257	0.053	0.293
YBL090W	0.043	0.205	0.041	0.147	0.044	0.125
YBL091C	0.044	0.84	0.041	0.518	0.044	0.395
YBL093C	0.044	0.048	0.039	0.047	0.045	0.046
YBL094C	0.04	0.792	0.041	0.583	0.044	0.272
YBL095W	0.043	0.879	0.047	0.871	0.05	0.642
YBL096C	0.041	0.885	0.041	0.841	0.048	0.706
YBL098W	0.044	0.883	0.044	0.826	0.051	0.693
YBL099W	0.046	0.729	0.041	0.714	0.047	0.626
YBL100C	0.045	0.736	0.04	0.694	0.05	0.618
YBL101C	0.049	0.936	0.042	0.858	0.046	0.722
YBL101w-C	0.041	0.092	0.043	0.068	0.04	0.055
YBL102W	0.05	0.885	0.043	0.781	0.048	0.563
YBL106C	0.039	0.869	0.04	0.769	0.043	0.669
YBL107C	0.039	0.835	0.039	0.774	0.044	0.688
YBR001C	0.039	0.836	0.039	0.756	0.043	0.599
YBR003W	0.04	0.682	0.04	0.643	0.043	0.419
YBR005W	0.04	0.892	0.042	0.818	0.044	0.662
YBR006W	0.039	0.838	0.039	0.698	0.041	0.245
YBR007C	0.039	0.846	0.04	0.71	0.042	0.628
YBR008C	0.043	0.874	0.044	0.759	0.043	0.624
YBR009C	0.04	0.777	0.041	0.646	0.043	0.438
YBR010W	0.043	0.871	0.043	0.831	0.052	0.716
YBR012C	0.041	0.843	0.042	0.778	0.047	0.638
YBR013C	0.042	0.885	0.04	0.786	0.046	0.685
YBR014C	0.042	0.89	0.042	0.802	0.046	0.686
YBR015C	0.042	0.816	0.041	0.77	0.045	0.706
YBR016W	0.041	0.848	0.041	0.764	0.046	0.615
YBR018C	0.044	0.846	0.04	0.722	0.047	0.628
YBR019C	0.048	0.852	0.043	0.831	0.047	0.671
YBR022W	0.038	0.85	0.041	0.731	0.043	0.704
YBR023C	0.038	0.866	0.039	0.559	0.044	0.203
YBR024W	0.04	0.874	0.041	0.681	0.045	0.702
YBR025C	0.041	0.78	0.044	0.712	0.052	0.675
YBR026C	0.04	0.854	0.043	0.811	0.044	0.719
YBR027C	0.039	0.825	0.041	0.395	0.042	0.103
YBR028C	0.038	0.761	0.039	0.641	0.043	0.486
YBR030w	0.039	0.731	0.041	0.599	0.043	0.472
YBR031W	0.039	0.484	0.043	0.491	0.046	0.397
YBR032W	0.051	0.878	0.053	0.844	0.056	0.658
YBR033W	0.05	0.883	0.049	0.788	0.057	0.478
YBR034C	0.046	0.725	0.047	0.655	0.053	0.681
YBR035C	0.045	0.071	0.047	0.079	0.055	0.076
YBR036C	0.045	0.596	0.049	0.553	0.054	0.272
YBR037C	0.047	0.649	0.048	0.49	0.053	0.298
YBR038W	0.051	0.842	0.053	0.78	0.054	0.671
YBR040W	0.045	0.86	0.049	0.815	0.052	0.55
YBR041W	0.045	0.642	0.047	0.645	0.051	0.361
YBR042C	0.047	0.651	0.048	0.59	0.05	0.347
YBR043C	0.047	0.806	0.048	0.775	0.05	0.406
YBR044C	0.042	0.854	0.043	0.849	0.047	0.667
YBR045C	0.04	0.91	0.047	0.823	0.047	0.659
YBR046C	0.041	0.854	0.044	0.761	0.045	0.648
YBR047W	0.04	0.836	0.043	0.682	0.046	0.342
YBR048W	0.04	0.579	0.046	0.442	0.048	0.412
YBR050C	0.042	0.841	0.053	0.829	0.047	0.641
YBR051W	0.042	0.874	0.05	0.82	0.046	0.55
YBR052C	0.04	0.861	0.047	0.762	0.044	0.571
YBR053C	0.041	0.736	0.049	0.776	0.044	0.415
YBR054W	0.04	0.842	0.051	0.818	0.043	0.566
YBR056W	0.041	0.92	0.041	0.875	0.046	0.572
YBR056w-A	0.039	0.726	0.04	0.727	0.039	0.332
YBR057C	0.042	0.913	0.043	0.811	0.05	0.574
YBR058C	0.041	0.868	0.04	0.767	0.044	0.695
YBR058c-A	0.036	0.042	0.037	0.044	0.034	0.04
YBR059C	0.043	0.847	0.041	0.765	0.045	0.459
YBR063C	0.047	0.9	0.04	0.819	0.046	0.596
YBR064W	0.046	0.897	0.04	0.786	0.047	0.579
YBR065C	0.042	0.856	0.041	0.736	0.045	0.528
YBR066C	0.043	0.749	0.041	0.746	0.047	0.55
YBR067C	0.042	0.818	0.043	0.838	0.049	0.453
YBR068C	0.042	0.842	0.049	0.817	0.045	0.553
YBR069C	0.041	0.416	0.044	0.092	0.045	0.055
YBR071W	0.042	0.883	0.045	0.733	0.042	0.412
YBR072c-A	0.042	0.859	0.041	0.428	0.05	0.675
YBR072W	0.041	0.882	0.044	0.762	0.041	0.438
YBR073W	0.042	0.863	0.047	0.784	0.041	0.592
YBR076W	0.042	0.871	0.046	0.767	0.042	0.433
YBR077C	0.044	0.679	0.046	0.453	0.041	0.089
YBR078W	0.04	0.266	0.044	0.266	0.039	0.112
YBR083W	0.041	0.599	0.043	0.842	0.043	0.368
YBR084C-A	0.041	0.266	0.042	0.424	0.038	0.115
YBR084W	0.046	0.894	0.041	0.81	0.039	0.297
YBR085c-A	0.038	0.852	0.041	0.766	0.04	0.558
YBR090C	0.041	0.373	0.039	0.7	0.039	0.471
YBR090C-A	0.049	0.945	0.039	0.811	0.039	0.403
YBR092C	0.045	0.952	0.038	0.823	0.037	0.339
YBR093C	0.045	0.927	0.039	0.815	0.038	0.469
YBR094W	0.044	0.926	0.037	0.791	0.037	0.285
YBR099C	0.045	0.898	0.039	0.722	0.038	0.256
YBR101C	0.048	0.955	0.042	0.827	0.039	0.366
YBR103W	0.045	0.818	0.039	0.675	0.039	0.158
YBR104W	0.047	0.932	0.038	0.815	0.04	0.247
YBR106W	0.041	0.143	0.037	0.115	0.037	0.052
YBR107C	0.043	0.898	0.039	0.781	0.041	0.185
YBR108W	0.045	0.921	0.038	0.777	0.041	0.231
YBR111w-A	0.038	0.778	0.038	0.307	0.042	0.378
YBR112C	0.037	0.043	0.039	0.041	0.037	0.04
YBR113W	0.046	0.904	0.042	0.76	0.041	0.318
YBR114W	0.043	0.86	0.037	0.694	0.037	0.222
YBR116C	0.041	0.851	0.037	0.674	0.036	0.104
YBR119W	0.043	0.705	0.038	0.618	0.038	0.173
YBR120C	0.048	0.956	0.04	0.864	0.037	0.253
YBR122C	0.044	0.844	0.04	0.698	0.048	0.673
YBR125C	0.04	0.678	0.039	0.394	0.04	0.403
YBR126C	0.064	0.211	0.05	0.062	0.045	0.056
YBR127C	0.051	0.058	0.044	0.055	0.044	0.052
YBR128C	0.05	0.673	0.043	0.518	0.042	0.269
YBR129C	0.051	0.945	0.044	0.838	0.045	0.321
YBR130C	0.054	0.933	0.043	0.845	0.043	0.352
YBR131W	0.044	0.558	0.042	0.627	0.043	0.676
YBR134W	0.045	0.765	0.043	0.336	0.041	0.136
YBR137W	0.056	0.892	0.041	0.713	0.041	0.309
YBR138C	0.045	0.896	0.038	0.714	0.039	0.186
YBR139W	0.051	0.954	0.04	0.843	0.04	0.558
YBR141C	0.045	0.931	0.039	0.771	0.038	0.192
YBR144C	0.044	0.936	0.039	0.835	0.039	0.438
YBR145W	0.045	0.928	0.037	0.746	0.039	0.227
YBR146W	0.045	0.933	0.039	0.774	0.039	0.428
YBR147W	0.043	0.92	0.037	0.705	0.038	0.376
YBR148W	0.043	0.872	0.038	0.633	0.038	0.291
YBR149W	0.041	0.86	0.038	0.698	0.038	0.207
YBR150C	0.044	0.868	0.042	0.898	0.039	0.704
YBR151W	0.049	0.96	0.041	0.866	0.04	0.598
YBR156C	0.043	0.809	0.037	0.637	0.038	0.352
YBR158W	0.041	0.917	0.036	0.738	0.038	0.366
YBR159W	0.043	0.905	0.037	0.751	0.036	0.347
YBR161W	0.037	0.916	0.037	0.746	0.038	0.25
YBR162C	0.049	0.894	0.043	0.712	0.046	0.404
YBR162W-A	0.047	0.962	0.039	0.834	0.041	0.476
YBR163W	0.041	0.383	0.037	0.159	0.037	0.055
YBR164C	0.048	0.512	0.039	0.151	0.038	0.085
YBR168W	0.039	0.149	0.038	0.369	0.039	0.049
YBR169C	0.041	0.692	0.039	0.885	0.039	0.429
YBR170C	0.045	0.919	0.039	0.73	0.038	0.234
YBR171W	0.044	0.189	0.038	0.105	0.037	0.044
YBR172C	0.04	0.87	0.04	0.729	0.038	0.351
YBR173C	0.048	0.507	0.047	0.441	0.044	0.147
YBR174C	0.045	0.617	0.041	0.6	0.044	0.519
YBR175W	0.045	0.594	0.04	0.541	0.044	0.435
YBR176W	0.05	0.919	0.039	0.877	0.042	0.805
YBR177C	0.045	0.945	0.04	0.918	0.042	0.83
YBR178W	0.046	0.953	0.042	0.914	0.039	0.708
YBR179C	0.049	0.616	0.04	0.436	0.039	0.322
YBR180W	0.047	0.942	0.041	0.891	0.041	0.759
YBR181C	0.044	0.548	0.039	0.547	0.038	0.385
YBR182C	0.042	0.914	0.039	0.807	0.038	0.567
YBR182c-A	0.039	0.861	0.04	0.642	0.041	0.41
YBR183W	0.046	0.91	0.041	0.726	0.04	0.719
YBR184W	0.05	0.949	0.044	0.902	0.042	0.778
YBR185C	0.046	0.95	0.044	0.921	0.044	0.884
YBR186W	0.047	0.957	0.044	0.911	0.045	0.786
YBR187W	0.042	0.896	0.036	0.815	0.043	0.717
YBR188C	0.043	0.932	0.041	0.882	0.041	0.712
YBR189W	0.049	0.187	0.056	0.179	0.048	0.186
YBR191W	0.05	0.344	0.048	0.292	0.045	0.192
YBR194W	0.041	0.15	0.038	0.249	0.038	0.214
YBR195C	0.042	0.86	0.039	0.775	0.041	0.585
YBR196c-A	0.038	0.726	0.041	0.762	0.041	0.406
YBR196c-B	0.038	0.879	0.041	0.879	0.044	0.529
YBR197C	0.047	0.92	0.045	0.88	0.043	0.778
YBR199W	0.043	0.941	0.039	0.791	0.041	0.607
YBR200W	0.041	0.05	0.038	0.041	0.04	0.041
YBR200w-A	0.038	0.837	0.042	0.804	0.04	0.424
YBR203W	0.049	0.948	0.039	0.875	0.039	0.674
YBR204C	0.045	0.943	0.041	0.867	0.038	0.662
YBR205W	0.044	0.914	0.038	0.777	0.038	0.578
YBR206W	0.044	0.903	0.039	0.869	0.039	0.577
YBR207W	0.044	0.902	0.041	0.831	0.04	0.587
YBR208C	0.046	0.904	0.04	0.851	0.04	0.561
YBR210W	0.042	0.911	0.039	0.77	0.039	0.776
YBR212W	0.041	0.916	0.036	0.778	0.037	0.569
YBR213W	0.044	0.918	0.039	0.815	0.038	0.636
YBR214W	0.046	0.953	0.042	0.946	0.04	0.704
YBR215W	0.046	0.927	0.038	0.807	0.039	0.559
YBR216C	0.046	0.94	0.041	0.842	0.038	0.407
YBR217W	0.043	0.885	0.038	0.755	0.037	0.28
YBR218C	0.046	0.905	0.038	0.842	0.042	0.618
YBR219C	0.046	0.924	0.039	0.721	0.041	0.683
YBR220C	0.047	0.931	0.042	0.84	0.046	0.58
YBR221C	0.059	0.904	0.05	0.889	0.053	0.862
YBR221w-A	0.036	0.204	0.039	0.222	0.039	0.136
YBR222C	0.052	0.953	0.049	0.842	0.047	0.813
YBR223C	0.048	0.948	0.044	0.749	0.046	0.825
YBR224W	0.052	0.934	0.044	0.853	0.044	0.728
YBR225W	0.046	0.938	0.043	0.901	0.045	0.803
YBR226C	0.051	0.934	0.047	0.904	0.045	0.851
YBR227C	0.047	0.926	0.045	0.901	0.044	0.734
YBR228W	0.048	0.925	0.042	0.852	0.042	0.48
YBR229C	0.045	0.896	0.041	0.781	0.043	0.433
YBR230C	0.046	0.897	0.041	0.809	0.042	0.656
YBR230W-A	0.04	0.936	0.04	0.864	0.045	0.772
YBR231C	0.044	0.772	0.042	0.459	0.041	0.228
YBR232C	0.047	0.849	0.047	0.719	0.045	0.632
YBR233W	0.049	0.915	0.041	0.808	0.045	0.799
YBR235W	0.045	0.903	0.039	0.809	0.043	0.701
YBR238C	0.046	0.916	0.04	0.832	0.044	0.763
YBR239C	0.045	0.921	0.04	0.847	0.044	0.734
YBR240C	0.047	0.936	0.039	0.805	0.042	0.683
YBR241C	0.043	0.904	0.038	0.769	0.042	0.601
YBR242W	0.044	0.906	0.039	0.789	0.043	0.733
YBR245C	0.044	0.935	0.039	0.783	0.04	0.788
YBR246W	0.041	0.875	0.038	0.74	0.039	0.829
YBR248C	0.041	0.923	0.038	0.804	0.039	0.684
YBR249C	0.041	0.878	0.037	0.759	0.037	0.641
YBR250W	0.042	0.906	0.037	0.81	0.036	0.731
YBR251W	0.043	0.9	0.037	0.833	0.039	0.824
YBR255W	0.04	0.814	0.037	0.429	0.037	0.677
YBR258C	0.049	0.966	0.039	0.808	0.042	0.748
YBR259W	0.044	0.965	0.038	0.847	0.042	0.837
YBR260C	0.047	0.957	0.04	0.862	0.045	0.798
YBR261C	0.042	0.926	0.038	0.762	0.041	0.782
YBR262C	0.043	0.932	0.038	0.794	0.046	0.804
YBR263W	0.044	0.931	0.038	0.762	0.044	0.693
YBR264C	0.044	0.94	0.039	0.836	0.041	0.839
YBR266C	0.046	0.146	0.038	0.092	0.04	0.163
YBR267W	0.042	0.106	0.039	0.087	0.042	0.172
YBR268W	0.041	0.8	0.039	0.648	0.041	0.662
YBR269C	0.041	0.859	0.041	0.76	0.042	0.341
YBR270C	0.039	0.525	0.039	0.84	0.037	0.215
YBR271W	0.043	0.891	0.044	0.817	0.045	0.757
YBR272C	0.042	0.695	0.037	0.753	0.037	0.236
YBR273C	0.042	0.868	0.04	0.735	0.042	0.704
YBR275C	0.045	0.672	0.038	0.722	0.041	0.146
YBR276C	0.045	0.621	0.04	0.831	0.039	0.66
YBR277C	0.042	0.828	0.039	0.68	0.045	0.47
YBR278W	0.042	0.869	0.041	0.73	0.045	0.656
YBR279W	0.039	0.046	0.037	0.043	0.04	0.045
YBR280C	0.044	0.506	0.039	0.76	0.039	0.366
YBR281C	0.047	0.915	0.046	0.876	0.045	0.491
YBR282W	0.042	0.184	0.043	0.126	0.042	0.06
YBR283C	0.045	0.788	0.045	0.683	0.043	0.415
YBR284W	0.048	0.957	0.048	0.858	0.044	0.643
YBR286W	0.048	0.915	0.04	0.773	0.044	0.391
YBR287W	0.044	0.677	0.038	0.715	0.043	0.595
YBR288C	0.044	0.273	0.037	0.201	0.042	0.242
YBR289W	0.04	0.051	0.042	0.048	0.039	0.045
YBR290W	0.048	0.965	0.048	0.901	0.05	0.859
YBR291C	0.044	0.873	0.045	0.727	0.045	0.244
YBR292C	0.045	0.908	0.045	0.829	0.045	0.529
YBR293W	0.045	0.907	0.044	0.888	0.043	0.752
YBR294W	0.047	0.576	0.04	0.651	0.04	0.552
YBR295W	0.053	0.926	0.052	0.871	0.046	0.593
YBR296C	0.045	0.911	0.048	0.868	0.048	0.694
YBR296c-A	0.037	0.819	0.041	0.862	0.038	0.307
YBR297W	0.045	0.879	0.042	0.702	0.042	0.639
YBR298C	0.044	0.816	0.043	0.269	0.042	0.153
YBR299W	0.042	0.841	0.043	0.817	0.041	0.162
YBR300C	0.044	0.884	0.045	0.641	0.044	0.576
YBR301W	0.042	0.41	0.048	0.8	0.04	0.236
YCL001W	0.058	0.924	0.042	0.803	0.051	0.55
YCL001W-A	0.044	0.858	0.042	0.717	0.044	0.194
YCL001w-B	0.039	0.828	0.042	0.81	0.038	0.297
YCL005W	0.052	0.853	0.039	0.707	0.043	0.206
YCL005W-A	0.039	0.051	0.039	0.061	0.041	0.048
YCL007C	0.046	0.096	0.039	0.072	0.042	0.065
YCL008C	0.05	0.868	0.039	0.787	0.041	0.404
YCL009C	0.051	0.957	0.042	0.924	0.042	0.845
YCL010C	0.046	0.827	0.038	0.527	0.04	0.213
YCL011C	0.05	0.883	0.04	0.742	0.042	0.365
YCL012C	0.047	0.899	0.044	0.878	0.045	0.645
YCL012W	0.053	0.95	0.041	0.861	0.043	0.781
YCL013W	0.05	0.909	0.042	0.83	0.043	0.268
YCL016C	0.041	0.179	0.038	0.157	0.036	0.076
YCL021w-A	0.046	0.931	0.044	0.86	0.041	0.743
YCL022C	0.05	0.916	0.053	0.819	0.05	0.405
YCL024W	0.045	0.95	0.038	0.764	0.041	0.709
YCL025C	0.048	0.965	0.04	0.848	0.041	0.785
YCL026C	0.058	0.927	0.044	0.919	0.048	0.287
YCL026C-A	0.037	0.495	0.049	0.812	0.043	0.064
YCL026c-B	0.055	0.941	0.045	0.818	0.041	0.576
YCL027W	0.049	0.984	0.044	0.932	0.043	0.723
YCL028W	0.047	0.963	0.041	0.909	0.04	0.667
YCL029C	0.048	0.323	0.044	0.19	0.04	0.074
YCL030C	0.043	0.576	0.041	0.616	0.039	0.252
YCL032W	0.042	0.906	0.04	0.849	0.041	0.322
YCL033C	0.047	0.919	0.039	0.859	0.041	0.642
YCL034W	0.046	0.906	0.04	0.824	0.04	0.643
YCL035C	0.048	0.997	0.044	0.808	0.042	0.256
YCL036W	0.051	0.926	0.04	0.773	0.043	0.666
YCL037C	0.051	0.803	0.04	0.433	0.042	0.313
YCL039W	0.044	0.956	0.04	0.917	0.037	0.702
YCL040W	0.043	0.922	0.038	0.84	0.036	0.359
YCL042W	0.044	0.897	0.037	0.871	0.037	0.399
YCL044C	0.047	0.924	0.041	0.933	0.039	0.75
YCL045C	0.043	0.916	0.037	0.831	0.037	0.617
YCL046W	0.04	0.103	0.037	0.078	0.036	0.116
YCL047C	0.044	0.959	0.037	0.82	0.038	0.747
YCL048W	0.042	0.807	0.037	0.633	0.039	0.311
YCL049C	0.043	0.889	0.037	0.758	0.037	0.346
YCL050C	0.062	0.921	0.055	0.869	0.052	0.586
YCL051W	0.054	0.778	0.051	0.727	0.048	0.225
YCL055W	0.056	0.872	0.049	0.783	0.047	0.383
YCL056C	0.058	0.91	0.051	0.899	0.047	0.722
YCL057c-A	0.037	0.76	0.044	0.819	0.039	0.327
YCL057W	0.053	0.964	0.049	0.883	0.044	0.692
YCL058C	0.052	0.385	0.051	0.507	0.048	0.206
YCL060C	0.052	0.852	0.045	0.715	0.044	0.364
YCL062W	0.051	0.889	0.041	0.753	0.041	0.159
YCL063W	0.046	0.818	0.042	0.651	0.04	0.166
YCL064C	0.042	0.895	0.041	0.836	0.039	0.323
YCL069W	0.042	0.902	0.038	0.763	0.039	0.289
YCL074W	0.048	0.935	0.042	0.877	0.042	0.578
YCL075W	0.043	0.95	0.04	0.836	0.043	0.575
YCL076W	0.043	0.934	0.039	0.633	0.045	0.42
YCR001W	0.045	0.955	0.039	0.884	0.042	0.407
YCR002C	0.04	0.318	0.04	0.279	0.038	0.13
YCR003W	0.038	0.12	0.037	0.153	0.035	0.083
YCR004C	0.045	0.945	0.042	0.885	0.037	0.557
YCR005C	0.042	0.913	0.036	0.849	0.037	0.4
YCR006C	0.044	0.915	0.037	0.842	0.037	0.604
YCR007C	0.042	0.91	0.039	0.841	0.039	0.707
YCR008W	0.044	0.905	0.037	0.863	0.037	0.739
YCR009C	0.039	0.172	0.037	0.119	0.037	0.113
YCR010C	0.041	0.925	0.036	0.743	0.036	0.554
YCR011C	0.043	0.904	0.036	0.759	0.037	0.604
YCR014C	0.045	0.941	0.041	0.927	0.039	0.447
YCR015C	0.046	0.95	0.039	0.912	0.038	0.431
YCR016W	0.048	0.928	0.04	0.87	0.038	0.597
YCR017C	0.045	0.87	0.039	0.756	0.04	0.187
YCR019W	0.047	0.89	0.041	0.815	0.039	0.453
YCR020C	0.05	0.913	0.039	0.8	0.042	0.591
YCR020C-A	0.043	0.863	0.039	0.596	0.04	0.135
YCR020W-B	0.039	0.126	0.039	0.092	0.039	0.076
YCR021C	0.043	0.933	0.038	0.826	0.042	0.647
YCR022C	0.045	0.907	0.039	0.793	0.039	0.493
YCR023C	0.049	0.943	0.041	0.817	0.043	0.693
YCR024C-A	0.042	0.897	0.042	0.844	0.043	0.448
YCR025C	0.043	0.895	0.047	0.896	0.042	0.583
YCR026C	0.052	0.878	0.045	0.756	0.046	0.277
YCR027C	0.042	0.904	0.041	0.772	0.041	0.649
YCR028C	0.039	0.048	0.039	0.047	0.038	0.047
YCR028C-A	0.04	0.256	0.05	0.419	0.043	0.211
YCR030C	0.04	0.741	0.052	0.851	0.04	0.194
YCR031C	0.042	0.749	0.041	0.569	0.042	0.76
YCR032W	0.037	0.688	0.044	0.774	0.039	0.119
YCR033W	0.04	0.371	0.048	0.675	0.04	0.067
YCR034W	0.044	0.761	0.048	0.562	0.048	0.094
YCR036W	0.048	0.859	0.048	0.738	0.046	0.125
YCR043C	0.055	0.937	0.054	0.902	0.049	0.755
YCR044C	0.041	0.101	0.047	0.081	0.046	0.053
YCR045C	0.046	0.843	0.048	0.515	0.045	0.104
YCR046C	0.04	0.37	0.043	0.197	0.038	0.075
YCR047C	0.04	0.051	0.042	0.049	0.041	0.047
YCR048W	0.038	0.582	0.042	0.651	0.042	0.286
YCR049C	0.051	0.936	0.051	0.877	0.05	0.712
YCR050C	0.047	0.884	0.048	0.752	0.049	0.259
YCR051W	0.044	0.821	0.043	0.715	0.044	0.637
YCR053W	0.038	0.383	0.044	0.652	0.046	0.263
YCR059C	0.044	0.92	0.047	0.86	0.043	0.612
YCR060W	0.041	0.642	0.056	0.916	0.042	0.628
YCR062W	0.039	0.426	0.047	0.807	0.041	0.08
YCR063W	0.045	0.497	0.044	0.294	0.043	0.46
YCR065W	0.042	0.794	0.045	0.309	0.044	0.133
YCR066W	0.043	0.715	0.042	0.549	0.042	0.305
YCR067C	0.038	0.731	0.05	0.86	0.036	0.192
YCR068W	0.046	0.856	0.043	0.747	0.041	0.138
YCR069W	0.04	0.743	0.046	0.789	0.037	0.185
YCR071C	0.039	0.1	0.042	0.086	0.038	0.056
YCR073C	0.047	0.926	0.046	0.741	0.039	0.284
YCR073W-A	0.042	0.884	0.042	0.805	0.042	0.662
YCR075C	0.039	0.675	0.043	0.705	0.039	0.233
YCR075w-A	0.039	0.824	0.038	0.29	0.041	0.188
YCR076C	0.043	0.918	0.045	0.883	0.039	0.644
YCR077C	0.046	0.347	0.045	0.67	0.047	0.302
YCR079W	0.046	0.929	0.044	0.865	0.046	0.747
YCR081W	0.041	0.807	0.046	0.512	0.042	0.045
YCR082W	0.044	0.956	0.046	0.912	0.043	0.544
YCR083W	0.04	0.481	0.041	0.443	0.039	0.316
YCR084C	0.034	0.079	0.038	0.04	0.038	0.039
YCR085W	0.047	0.931	0.047	0.824	0.04	0.215
YCR086W	0.04	0.529	0.041	0.272	0.039	0.059
YCR087C-A	0.043	0.828	0.041	0.447	0.039	0.069
YCR087W	0.04	0.762	0.04	0.271	0.039	0.059
YCR088W	0.042	0.42	0.043	0.312	0.038	0.409
YCR089W	0.04	0.362	0.042	0.348	0.039	0.271
YCR090C	0.05	0.946	0.047	0.884	0.047	0.778
YCR091W	0.046	0.914	0.043	0.854	0.046	0.705
YCR092C	0.049	0.937	0.045	0.853	0.044	0.78
YCR094W	0.042	0.199	0.04	0.471	0.042	0.543
YCR095C	0.048	0.857	0.055	0.746	0.046	0.192
YCR095W-A	0.041	0.898	0.038	0.79	0.044	0.712
YCR098C	0.045	0.823	0.044	0.807	0.045	0.792
YCR099C	0.047	0.956	0.045	0.91	0.045	0.792
YCR100C	0.047	0.906	0.043	0.848	0.044	0.746
YCR101C	0.045	0.881	0.041	0.855	0.042	0.763
YCR102C	0.048	0.877	0.043	0.769	0.047	0.744
YCR102W-A	0.047	0.864	0.053	0.693	0.045	0.296
YCR105W	0.047	0.935	0.044	0.871	0.043	0.732
YCR106W	0.043	0.933	0.041	0.885	0.041	0.717
YCR107W	0.043	0.872	0.042	0.774	0.038	0.56
YDL001W	0.043	0.793	0.043	0.467	0.043	0.487
YDL002C	0.044	0.829	0.044	0.436	0.045	0.168
YDL006W	0.043	0.42	0.041	0.253	0.044	0.21
YDL009C	0.043	0.813	0.04	0.45	0.044	0.224
YDL010W	0.043	0.822	0.042	0.643	0.046	0.38
YDL011C	0.043	0.811	0.041	0.463	0.045	0.274
YDL012C	0.041	0.769	0.042	0.663	0.043	0.387
YDL013W	0.042	0.077	0.043	0.05	0.043	0.046
YDL018C	0.043	0.782	0.04	0.398	0.04	0.149
YDL020C	0.041	0.425	0.04	0.068	0.041	0.049
YDL021W	0.041	0.67	0.04	0.181	0.04	0.062
YDL022W	0.042	0.8	0.039	0.629	0.04	0.241
YDL023C	0.044	0.7	0.041	0.598	0.041	0.327
YDL024C	0.046	0.758	0.04	0.546	0.041	0.254
YDL025C	0.042	0.751	0.044	0.242	0.042	0.081
YDL027C	0.044	0.848	0.041	0.331	0.042	0.167
YDL032W	0.04	0.161	0.039	0.117	0.039	0.089
YDL033C	0.041	0.242	0.041	0.141	0.04	0.087
YDL035C	0.041	0.533	0.042	0.394	0.04	0.195
YDL037C	0.039	0.7	0.04	0.189	0.04	0.089
YDL040C	0.039	0.112	0.039	0.075	0.039	0.056
YDL041W	0.041	0.095	0.039	0.078	0.042	0.097
YDL042C	0.04	0.68	0.038	0.363	0.04	0.414
YDL044C	0.039	0.152	0.04	0.101	0.038	0.077
YDL045W-A	0.039	0.077	0.042	0.071	0.039	0.049
YDL046W	0.039	0.748	0.041	0.369	0.038	0.099
YDL047W	0.042	0.087	0.04	0.06	0.038	0.053
YDL048C	0.045	0.637	0.05	0.232	0.048	0.201
YDL049C	0.047	0.809	0.048	0.259	0.048	0.2
YDL050C	0.045	0.777	0.046	0.185	0.046	0.113
YDL051W	0.044	0.703	0.046	0.162	0.047	0.111
YDL052C	0.044	0.397	0.047	0.136	0.046	0.127
YDL054C	0.043	0.698	0.045	0.322	0.045	0.147
YDL056W	0.047	0.117	0.045	0.089	0.044	0.078
YDL057W	0.042	0.704	0.042	0.216	0.042	0.116
YDL059C	0.044	0.697	0.046	0.227	0.045	0.147
YDL062W	0.042	0.443	0.042	0.217	0.042	0.254
YDL063C	0.042	0.31	0.041	0.141	0.043	0.199
YDL065C	0.04	0.739	0.041	0.276	0.042	0.162
YDL066W	0.041	0.442	0.04	0.061	0.04	0.047
YDL068W	0.04	0.185	0.042	0.102	0.04	0.065
YDL070W	0.041	0.604	0.04	0.219	0.039	0.098
YDL071C	0.04	0.708	0.04	0.386	0.041	0.203
YDL072C	0.041	0.685	0.039	0.347	0.042	0.213
YDL073W	0.04	0.748	0.04	0.309	0.042	0.111
YDL075W	0.042	0.051	0.039	0.045	0.043	0.057
YDL076C	0.04	0.684	0.038	0.168	0.04	0.115
YDL078C	0.041	0.757	0.039	0.377	0.041	0.269
YDL079C	0.039	0.69	0.039	0.332	0.04	0.172
YDL080C	0.039	0.56	0.038	0.223	0.039	0.103
YDL081C	0.04	0.119	0.039	0.068	0.039	0.071
YDL082W	0.04	0.282	0.04	0.138	0.041	0.169
YDL083C	0.042	0.393	0.041	0.126	0.042	0.193
YDL085c-A	0.038	0.877	0.037	0.384	0.042	0.392
YDL085W	0.041	0.73	0.042	0.321	0.042	0.202
YDL086W	0.044	0.718	0.043	0.416	0.042	0.254
YDL088C	0.042	0.688	0.041	0.335	0.042	0.33
YDL089W	0.044	0.765	0.041	0.357	0.045	0.238
YDL090C	0.041	0.175	0.042	0.113	0.041	0.129
YDL091C	0.041	0.757	0.041	0.412	0.043	0.254
YDL093W	0.041	0.725	0.04	0.57	0.042	0.152
YDL094C	0.041	0.709	0.04	0.386	0.043	0.234
YDL096C	0.046	0.817	0.047	0.728	0.048	0.447
YDL099W	0.044	0.89	0.044	0.745	0.044	0.312
YDL100C	0.044	0.738	0.044	0.594	0.042	0.213
YDL101C	0.04	0.386	0.041	0.231	0.044	0.095
YDL104C	0.043	0.788	0.044	0.648	0.043	0.223
YDL106C	0.042	0.111	0.041	0.12	0.043	0.079
YDL107W	0.043	0.585	0.043	0.418	0.041	0.157
YDL109C	0.039	0.76	0.04	0.588	0.04	0.172
YDL110C	0.041	0.674	0.039	0.554	0.038	0.14
YDL112W	0.04	0.763	0.057	0.729	0.04	0.302
YDL113C	0.041	0.848	0.041	0.752	0.04	0.387
YDL114W	0.04	0.839	0.041	0.68	0.04	0.344
YDL115C	0.04	0.06	0.04	0.049	0.04	0.046
YDL116W	0.041	0.063	0.042	0.067	0.04	0.059
YDL117W	0.043	0.092	0.045	0.06	0.041	0.052
YDL118W	0.04	0.8	0.042	0.261	0.04	0.166
YDL119C	0.042	0.476	0.044	0.175	0.039	0.094
YDL121C	0.042	0.905	0.042	0.807	0.044	0.312
YDL122W	0.041	0.858	0.041	0.787	0.041	0.315
YDL123W	0.041	0.893	0.042	0.801	0.042	0.308
YDL124W	0.04	0.812	0.041	0.759	0.041	0.313
YDL125C	0.04	0.833	0.041	0.769	0.04	0.314
YDL127W	0.04	0.783	0.041	0.599	0.04	0.327
YDL128W	0.04	0.87	0.042	0.738	0.041	0.37
YDL129W	0.04	0.82	0.041	0.686	0.041	0.306
YDL130W	0.04	0.307	0.041	0.295	0.042	0.19
YDL130W-A	0.042	0.89	0.041	0.867	0.04	0.733
YDL131W	0.042	0.801	0.043	0.68	0.041	0.234
YDL133C-A	0.048	0.851	0.049	0.66	0.046	0.335
YDL133W	0.037	0.615	0.038	0.122	0.04	0.052
YDL134C	0.04	0.752	0.038	0.687	0.041	0.383
YDL134C-A	0.041	0.873	0.039	0.71	0.04	0.274
YDL135C	0.039	0.796	0.04	0.596	0.039	0.182
YDL136W	0.039	0.351	0.04	0.409	0.039	0.311
YDL137W	0.04	0.875	0.043	0.693	0.039	0.277
YDL138W	0.039	0.826	0.041	0.661	0.039	0.367
YDL142C	0.039	0.826	0.041	0.721	0.04	0.256
YDL144C	0.044	0.906	0.046	0.81	0.051	0.235
YDL146W	0.045	0.735	0.046	0.789	0.048	0.263
YDL149W	0.049	0.872	0.046	0.747	0.051	0.456
YDL151C	0.044	0.093	0.044	0.092	0.044	0.067
YDL154W	0.044	0.828	0.045	0.704	0.044	0.234
YDL155W	0.043	0.822	0.044	0.687	0.042	0.188
YDL156W	0.04	0.656	0.042	0.697	0.042	0.211
YDL157C	0.04	0.627	0.041	0.739	0.041	0.217
YDL159w-A	0.038	0.846	0.039	0.491	0.044	0.38
YDL160C	0.039	0.138	0.041	0.145	0.041	0.101
YDL160c-A	0.036	0.764	0.045	0.579	0.04	0.374
YDL161W	0.04	0.801	0.042	0.704	0.041	0.343
YDL162C	0.04	0.618	0.042	0.446	0.045	0.27
YDL167C	0.045	0.852	0.044	0.826	0.041	0.627
YDL168W	0.04	0.851	0.041	0.712	0.043	0.269
YDL169C	0.04	0.723	0.04	0.725	0.04	0.234
YDL170W	0.04	0.846	0.04	0.787	0.042	0.326
YDL171C	0.04	0.801	0.041	0.762	0.041	0.38
YDL172C	0.038	0.755	0.04	0.751	0.04	0.316
YDL173W	0.04	0.813	0.04	0.727	0.04	0.397
YDL174C	0.04	0.798	0.041	0.765	0.04	0.446
YDL175C	0.041	0.77	0.041	0.684	0.04	0.334
YDL176W	0.04	0.827	0.04	0.643	0.04	0.237
YDL177C	0.04	0.825	0.041	0.699	0.042	0.358
YDL178W	0.041	0.863	0.042	0.721	0.041	0.233
YDL179W	0.044	0.867	0.043	0.778	0.042	0.355
YDL180W	0.04	0.811	0.042	0.737	0.043	0.282
YDL182W	0.041	0.778	0.041	0.728	0.043	0.35
YDL183C	0.041	0.664	0.041	0.574	0.039	0.148
YDL184C	0.041	0.799	0.041	0.737	0.042	0.374
YDL185W	0.04	0.061	0.041	0.057	0.039	0.048
YDL186W	0.042	0.778	0.042	0.7	0.04	0.244
YDL187C	0.042	0.786	0.043	0.697	0.039	0.376
YDL188C	0.043	0.736	0.041	0.691	0.039	0.33
YDL189W	0.044	0.73	0.041	0.55	0.039	0.142
YDL190C	0.041	0.764	0.044	0.709	0.041	0.332
YDL191W	0.046	0.242	0.057	0.182	0.057	0.184
YDL192W	0.041	0.703	0.05	0.699	0.052	0.394
YDL194W	0.046	0.428	0.058	0.692	0.05	0.462
YDL197C	0.043	0.9	0.048	0.865	0.052	0.606
YDL198C	0.045	0.161	0.047	0.082	0.049	0.065
YDL199C	0.044	0.901	0.048	0.88	0.05	0.628
YDL200C	0.044	0.915	0.047	0.888	0.047	0.648
YDL201W	0.046	0.908	0.05	0.88	0.048	0.654
YDL202W	0.051	0.629	0.053	0.512	0.049	0.265
YDL203C	0.042	0.98	0.049	0.845	0.051	0.624
YDL204W	0.041	0.978	0.048	0.894	0.046	0.743
YDL206W	0.041	0.937	0.048	0.894	0.047	0.609
YDL210W	0.042	0.931	0.048	0.9	0.046	0.585
YDL211C	0.041	0.895	0.045	0.859	0.045	0.587
YDL213C	0.047	0.834	0.047	0.746	0.047	0.317
YDL214C	0.048	0.951	0.053	0.896	0.049	0.664
YDL215C	0.057	0.962	0.061	0.982	0.057	0.819
YDL216C	0.047	0.973	0.052	0.97	0.047	0.688
YDL218W	0.045	0.901	0.051	0.934	0.05	0.495
YDL219W	0.042	0.9	0.046	0.809	0.046	0.403
YDL222C	0.047	0.906	0.049	0.885	0.048	0.634
YDL223C	0.045	0.867	0.047	0.818	0.046	0.538
YDL224C	0.051	0.912	0.05	0.856	0.05	0.679
YDL225W	0.046	0.825	0.045	0.709	0.045	0.459
YDL226C	0.05	0.813	0.05	0.739	0.048	0.507
YDL227C	0.041	0.936	0.044	0.849	0.047	0.654
YDL229W	0.038	0.898	0.044	0.846	0.044	0.557
YDL230W	0.04	0.919	0.045	0.862	0.046	0.546
YDL231C	0.04	0.901	0.044	0.882	0.045	0.273
YDL232W	0.041	0.885	0.044	0.858	0.043	0.426
YDL233W	0.04	0.865	0.043	0.838	0.042	0.402
YDL234C	0.046	0.943	0.05	0.876	0.049	0.506
YDL236W	0.04	0.808	0.041	0.586	0.042	0.258
YDL237W	0.041	0.866	0.043	0.786	0.044	0.544
YDL238C	0.043	0.816	0.041	0.76	0.042	0.429
YDL239C	0.048	0.896	0.043	0.815	0.046	0.558
YDL240W	0.058	0.98	0.063	0.98	0.057	0.832
YDL241W	0.048	0.934	0.058	0.943	0.051	0.484
YDL242W	0.048	0.943	0.053	0.895	0.049	0.363
YDL243C	0.047	0.914	0.053	0.906	0.049	0.324
YDR001C	0.047	0.883	0.053	0.852	0.05	0.288
YDR003W	0.054	0.891	0.058	0.868	0.056	0.435
YDR003w-A	0.037	0.156	0.038	0.258	0.042	0.185
YDR004W	0.049	0.599	0.052	0.391	0.05	0.13
YDR005C	0.05	0.81	0.055	0.766	0.052	0.457
YDR006C	0.051	0.89	0.05	0.841	0.048	0.584
YDR008C	0.055	0.943	0.053	0.879	0.049	0.533
YDR009W	0.045	0.921	0.05	0.94	0.047	0.705
YDR010C	0.05	0.946	0.048	0.931	0.046	0.607
YDR011W	0.045	0.922	0.048	0.933	0.045	0.5
YDR014W	0.044	0.86	0.046	0.841	0.043	0.289
YDR015C	0.044	0.877	0.046	0.875	0.044	0.48
YDR017C	0.045	0.077	0.043	0.078	0.043	0.061
YDR018C	0.046	0.873	0.048	0.838	0.047	0.498
YDR019C	0.049	0.902	0.05	0.902	0.05	0.609
YDR020C	0.05	0.889	0.047	0.84	0.046	0.61
YDR022C	0.045	0.919	0.043	0.795	0.043	0.561
YDR024W	0.045	0.412	0.044	0.241	0.044	0.203
YDR025W	0.045	0.288	0.044	0.255	0.043	0.266
YDR026C	0.04	0.83	0.043	0.824	0.041	0.349
YDR027C	0.04	0.29	0.043	0.232	0.042	0.099
YDR028C	0.044	0.469	0.046	0.181	0.047	0.048
YDR029W	0.046	0.915	0.047	0.876	0.044	0.607
YDR030C	0.048	0.905	0.048	0.863	0.047	0.648
YDR031W	0.046	0.916	0.045	0.846	0.046	0.579
YDR032C	0.049	0.93	0.049	0.881	0.046	0.716
YDR033W	0.051	0.936	0.055	0.899	0.046	0.643
YDR034C	0.043	0.961	0.051	0.921	0.049	0.641
YDR034w-B	0.036	0.669	0.04	0.626	0.039	0.319
YDR035W	0.044	0.965	0.051	0.911	0.046	0.651
YDR036C	0.045	0.97	0.047	0.88	0.046	0.573
YDR042C	0.042	0.924	0.048	0.893	0.046	0.686
YDR043C	0.042	0.9	0.047	0.841	0.044	0.472
YDR046C	0.043	0.925	0.044	0.82	0.043	0.394
YDR048C	0.043	0.573	0.049	0.698	0.045	0.224
YDR049W	0.048	0.614	0.048	0.724	0.051	0.613
YDR051C	0.042	0.729	0.047	0.857	0.049	0.717
YDR055W	0.04	0.788	0.047	0.854	0.05	0.709
YDR056C	0.041	0.805	0.051	0.893	0.052	0.791
YDR057W	0.039	0.463	0.047	0.813	0.049	0.742
YDR058C	0.048	0.884	0.05	0.567	0.048	0.238
YDR059C	0.043	0.803	0.053	0.866	0.055	0.77
YDR061W	0.043	0.87	0.05	0.834	0.055	0.753
YDR063W	0.043	0.841	0.041	0.859	0.044	0.737
YDR065W	0.043	0.349	0.04	0.337	0.046	0.18
YDR066C	0.044	0.755	0.04	0.919	0.049	0.797
YDR067C	0.046	0.923	0.04	0.903	0.05	0.611
YDR068W	0.044	0.84	0.041	0.921	0.049	0.789
YDR069C	0.04	0.532	0.037	0.252	0.042	0.091
YDR070C	0.044	0.686	0.039	0.829	0.047	0.702
YDR071C	0.045	0.878	0.044	0.751	0.043	0.334
YDR072C	0.045	0.727	0.041	0.643	0.046	0.13
YDR073W	0.043	0.779	0.039	0.737	0.048	0.496
YDR074W	0.043	0.307	0.044	0.108	0.041	0.043
YDR075W	0.044	0.765	0.05	0.807	0.051	0.571
YDR076W	0.039	0.286	0.044	0.416	0.046	0.174
YDR077W	0.041	0.79	0.046	0.836	0.05	0.762
YDR078C	0.039	0.788	0.047	0.808	0.048	0.628
YDR079c-A	0.037	0.662	0.039	0.712	0.039	0.353
YDR079W	0.039	0.65	0.048	0.449	0.044	0.255
YDR080W	0.04	0.611	0.052	0.794	0.05	0.631
YDR083W	0.04	0.358	0.051	0.664	0.049	0.623
YDR084C	0.04	0.773	0.055	0.893	0.054	0.751
YDR085C	0.039	0.67	0.05	0.831	0.051	0.724
YDR089W	0.037	0.719	0.038	0.774	0.041	0.426
YDR093W	0.038	0.471	0.041	0.48	0.043	0.47
YDR094W	0.038	0.622	0.04	0.605	0.041	0.396
YDR095C	0.041	0.656	0.044	0.734	0.045	0.633
YDR096W	0.042	0.796	0.044	0.816	0.05	0.575
YDR097C	0.041	0.67	0.045	0.767	0.048	0.495
YDR098C	0.051	0.771	0.051	0.828	0.053	0.495
YDR099W	0.049	0.838	0.058	0.875	0.057	0.629
YDR100W	0.046	0.838	0.052	0.715	0.055	0.468
YDR101C	0.047	0.488	0.053	0.72	0.054	0.45
YDR102C	0.044	0.85	0.051	0.839	0.053	0.499
YDR104C	0.051	0.916	0.061	0.799	0.058	0.677
YDR105C	0.044	0.894	0.052	0.745	0.053	0.57
YDR107C	0.043	0.802	0.051	0.766	0.054	0.724
YDR108W	0.041	0.552	0.047	0.632	0.053	0.564
YDR109C	0.044	0.795	0.05	0.781	0.058	0.671
YDR110W	0.048	0.715	0.05	0.746	0.06	0.618
YDR111C	0.042	0.813	0.047	0.866	0.045	0.612
YDR112W	0.041	0.867	0.045	0.798	0.045	0.511
YDR114C	0.043	0.621	0.044	0.566	0.046	0.321
YDR115W	0.044	0.373	0.044	0.35	0.047	0.127
YDR116C	0.044	0.841	0.045	0.712	0.048	0.364
YDR117C	0.043	0.942	0.048	0.824	0.048	0.71
YDR119W	0.043	0.928	0.048	0.822	0.049	0.772
YDR120C	0.044	0.818	0.046	0.42	0.047	0.134
YDR121W	0.047	0.909	0.049	0.818	0.05	0.634
YDR122W	0.044	0.906	0.046	0.815	0.05	0.638
YDR123C	0.04	0.345	0.045	0.167	0.042	0.324
YDR124W	0.043	0.932	0.049	0.908	0.045	0.9
YDR125C	0.043	0.818	0.044	0.673	0.043	0.75
YDR126W	0.041	0.095	0.047	0.091	0.043	0.072
YDR127W	0.042	0.779	0.044	0.732	0.043	0.415
YDR128W	0.043	0.911	0.044	0.696	0.047	0.305
YDR129C	0.038	0.127	0.044	0.133	0.046	0.077
YDR130C	0.041	0.928	0.044	0.819	0.047	0.769
YDR131C	0.041	0.889	0.043	0.838	0.044	0.745
YDR132C	0.042	0.903	0.044	0.832	0.046	0.75
YDR133C	0.042	0.911	0.045	0.837	0.047	0.689
YDR134C	0.039	0.893	0.046	0.746	0.048	0.409
YDR135C	0.04	0.828	0.05	0.795	0.047	0.143
YDR136C	0.041	0.645	0.047	0.196	0.046	0.196
YDR137W	0.041	0.715	0.046	0.358	0.047	0.322
YDR138W	0.039	0.082	0.041	0.074	0.041	0.069
YDR139C	0.042	0.91	0.047	0.855	0.048	0.727
YDR140W	0.04	0.168	0.05	0.273	0.05	0.163
YDR142C	0.04	0.924	0.047	0.826	0.045	0.707
YDR143C	0.042	0.911	0.047	0.856	0.047	0.853
YDR148C	0.047	0.926	0.047	0.816	0.041	0.745
YDR149C	0.044	0.706	0.044	0.284	0.04	0.063
YDR150W	0.042	0.216	0.041	0.227	0.039	0.157
YDR151C	0.042	0.863	0.042	0.765	0.039	0.635
YDR152W	0.044	0.911	0.041	0.779	0.041	0.625
YDR153C	0.043	0.91	0.041	0.754	0.041	0.607
YDR154C	0.044	0.884	0.042	0.785	0.041	0.599
YDR155C	0.042	0.855	0.041	0.708	0.039	0.543
YDR156W	0.043	0.769	0.042	0.672	0.043	0.672
YDR157W	0.042	0.823	0.042	0.634	0.04	0.401
YDR158W	0.047	0.736	0.043	0.701	0.04	0.576
YDR159W	0.047	0.156	0.043	0.146	0.042	0.154
YDR161W	0.046	0.124	0.041	0.109	0.044	0.127
YDR162C	0.044	0.848	0.042	0.714	0.039	0.55
YDR163W	0.044	0.977	0.042	0.877	0.039	0.838
YDR165W	0.044	0.972	0.04	0.785	0.041	0.825
YDR169C	0.045	0.919	0.04	0.816	0.043	0.712
YDR169c-A	0.038	0.664	0.039	0.455	0.04	0.384
YDR171W	0.046	0.927	0.041	0.724	0.04	0.643
YDR173C	0.043	0.297	0.039	0.178	0.039	0.208
YDR174W	0.046	0.107	0.05	0.106	0.045	0.127
YDR175C	0.042	0.146	0.039	0.112	0.038	0.105
YDR176W	0.043	0.172	0.038	0.044	0.038	0.042
YDR178W	0.044	0.908	0.04	0.674	0.04	0.481
YDR179C	0.041	0.889	0.039	0.727	0.038	0.524
YDR181C	0.045	0.85	0.041	0.295	0.039	0.097
YDR182w-A	0.037	0.644	0.041	0.668	0.038	0.277
YDR183W	0.042	0.945	0.04	0.459	0.038	0.732
YDR184C	0.043	0.879	0.039	0.388	0.038	0.551
YDR185C	0.044	0.935	0.039	0.646	0.04	0.398
YDR186C	0.042	0.89	0.039	0.693	0.039	0.665
YDR191W	0.041	0.915	0.04	0.752	0.036	0.432
YDR192C	0.04	0.833	0.04	0.678	0.037	0.478
YDR193W	0.04	0.791	0.04	0.683	0.037	0.552
YDR194C	0.052	0.112	0.045	0.111	0.046	0.113
YDR194w-A	0.037	0.635	0.04	0.705	0.038	0.29
YDR195W	0.047	0.085	0.042	0.059	0.045	0.057
YDR197W	0.049	0.724	0.042	0.322	0.044	0.285
YDR198C	0.051	0.93	0.043	0.797	0.044	0.711
YDR199W	0.049	0.912	0.042	0.755	0.046	0.599
YDR200C	0.055	0.444	0.043	0.315	0.046	0.271
YDR202C	0.048	0.094	0.05	0.083	0.046	0.196
YDR203W	0.046	0.079	0.041	0.063	0.043	0.079
YDR204W	0.045	0.69	0.042	0.261	0.043	0.229
YDR205W	0.047	0.844	0.046	0.289	0.045	0.3
YDR206W	0.046	0.912	0.041	0.783	0.04	0.769
YDR207C	0.042	0.13	0.038	0.059	0.041	0.052
YDR209C	0.045	0.88	0.037	0.668	0.04	0.468
YDR210W	0.046	0.91	0.038	0.768	0.039	0.639
YDR213W	0.047	0.895	0.04	0.661	0.041	0.666
YDR214W	0.043	0.934	0.038	0.708	0.039	0.423
YDR215C	0.043	0.918	0.038	0.74	0.039	0.447
YDR216W	0.042	0.884	0.039	0.689	0.038	0.427
YDR217C	0.045	0.869	0.04	0.597	0.04	0.474
YDR218C	0.045	0.926	0.039	0.764	0.041	0.69
YDR219C	0.041	0.862	0.036	0.405	0.04	0.445
YDR220C	0.04	0.868	0.037	0.759	0.038	0.518
YDR221W	0.043	0.908	0.037	0.763	0.039	0.751
YDR222W	0.042	0.852	0.035	0.629	0.037	0.551
YDR223W	0.04	0.866	0.036	0.725	0.037	0.436
YDR225W	0.041	0.569	0.036	0.277	0.036	0.201
YDR226W	0.038	0.076	0.036	0.047	0.035	0.041
YDR229W	0.044	0.89	0.038	0.76	0.039	0.455
YDR230W	0.047	0.742	0.043	0.617	0.044	0.407
YDR231C	0.045	0.732	0.039	0.376	0.041	0.237
YDR233C	0.045	0.9	0.042	0.816	0.041	0.771
YDR234W	0.045	0.923	0.039	0.791	0.04	0.752
YDR237W	0.046	0.574	0.039	0.397	0.048	0.37
YDR239C	0.042	0.9	0.04	0.77	0.038	0.303
YDR241W	0.045	0.243	0.04	0.203	0.04	0.266
YDR242W	0.051	0.921	0.042	0.761	0.041	0.585
YDR244W	0.044	0.821	0.044	0.581	0.044	0.558
YDR245W	0.04	0.066	0.041	0.056	0.044	0.059
YDR246w-A	0.04	0.854	0.038	0.259	0.039	0.627
YDR247W	0.04	0.723	0.041	0.352	0.041	0.353
YDR248C	0.04	0.779	0.042	0.501	0.043	0.473
YDR249C	0.042	0.846	0.041	0.649	0.044	0.541
YDR250C	0.041	0.776	0.041	0.548	0.041	0.409
YDR251W	0.039	0.777	0.041	0.618	0.044	0.559
YDR252W	0.04	0.692	0.042	0.542	0.042	0.364
YDR253C	0.041	0.677	0.042	0.356	0.045	0.284
YDR254W	0.043	0.818	0.046	0.41	0.047	0.595
YDR255C	0.04	0.883	0.041	0.542	0.041	0.659
YDR256C	0.041	0.846	0.04	0.488	0.04	0.44
YDR257C	0.04	0.649	0.04	0.338	0.042	0.374
YDR258C	0.04	0.815	0.04	0.471	0.042	0.46
YDR259C	0.041	0.877	0.043	0.612	0.042	0.585
YDR260C	0.04	0.721	0.041	0.491	0.041	0.43
YDR261C	0.04	0.844	0.041	0.559	0.041	0.436
YDR262W	0.039	0.655	0.04	0.491	0.04	0.413
YDR263C	0.041	0.762	0.04	0.588	0.04	0.377
YDR264C	0.039	0.058	0.041	0.042	0.04	0.043
YDR265W	0.042	0.743	0.042	0.607	0.042	0.525
YDR266C	0.046	0.858	0.042	0.438	0.048	0.661
YDR268W	0.041	0.224	0.042	0.156	0.044	0.196
YDR270W	0.038	0.729	0.04	0.5	0.04	0.419
YDR272W	0.045	0.826	0.041	0.599	0.043	0.541
YDR273W	0.04	0.627	0.041	0.429	0.041	0.534
YDR274C	0.039	0.733	0.041	0.544	0.042	0.524
YDR275W	0.039	0.689	0.04	0.517	0.042	0.413
YDR276C	0.039	0.649	0.041	0.447	0.041	0.373
YDR277C	0.041	0.693	0.041	0.542	0.044	0.444
YDR278C	0.042	0.917	0.041	0.627	0.048	0.769
YDR279W	0.041	0.876	0.039	0.5	0.045	0.62
YDR281C	0.04	0.752	0.039	0.375	0.045	0.47
YDR282C	0.038	0.808	0.039	0.533	0.044	0.497
YDR283C	0.039	0.816	0.039	0.645	0.045	0.674
YDR284C	0.04	0.871	0.04	0.683	0.044	0.555
YDR285W	0.039	0.737	0.039	0.609	0.043	0.456
YDR286C	0.039	0.48	0.038	0.435	0.04	0.34
YDR287W	0.039	0.776	0.039	0.48	0.044	0.394
YDR289C	0.04	0.055	0.039	0.055	0.041	0.078
YDR291W	0.047	0.867	0.043	0.559	0.05	0.616
YDR293C	0.043	0.215	0.041	0.067	0.049	0.057
YDR294C	0.045	0.844	0.044	0.525	0.048	0.485
YDR295C	0.045	0.756	0.043	0.632	0.046	0.459
YDR296W	0.045	0.11	0.045	0.117	0.048	0.138
YDR297W	0.045	0.381	0.044	0.326	0.046	0.311
YDR298C	0.043	0.126	0.044	0.122	0.047	0.164
YDR300C	0.043	0.064	0.042	0.056	0.044	0.056
YDR304C	0.042	0.839	0.039	0.561	0.043	0.6
YDR305C	0.042	0.727	0.04	0.426	0.043	0.542
YDR306C	0.041	0.711	0.04	0.465	0.043	0.486
YDR307W	0.04	0.777	0.039	0.451	0.042	0.378
YDR309C	0.04	0.774	0.039	0.482	0.042	0.518
YDR310C	0.04	0.694	0.041	0.327	0.041	0.197
YDR312W	0.041	0.754	0.04	0.482	0.041	0.317
YDR313C	0.042	0.781	0.04	0.599	0.042	0.393
YDR314C	0.041	0.856	0.043	0.786	0.044	0.58
YDR316W	0.046	0.893	0.045	0.758	0.042	0.594
YDR317W	0.042	0.857	0.043	0.645	0.041	0.264
YDR319C	0.04	0.851	0.041	0.731	0.04	0.552
YDR320C	0.04	0.267	0.043	0.197	0.042	0.196
YDR321W	0.039	0.82	0.042	0.772	0.042	0.626
YDR322c-A	0.039	0.079	0.037	0.19	0.039	0.124
YDR322W	0.038	0.332	0.042	0.246	0.041	0.227
YDR323C	0.039	0.105	0.042	0.079	0.04	0.078
YDR326C	0.047	0.923	0.043	0.757	0.04	0.215
YDR329C	0.042	0.875	0.043	0.788	0.043	0.7
YDR330W	0.042	0.896	0.042	0.693	0.043	0.608
YDR332W	0.04	0.227	0.041	0.248	0.042	0.22
YDR333C	0.042	0.841	0.042	0.791	0.044	0.753
YDR334W	0.04	0.632	0.041	0.281	0.042	0.227
YDR337W	0.041	0.359	0.041	0.348	0.045	0.374
YDR338C	0.052	0.988	0.054	0.999	0.056	0.691
YDR340W	0.048	0.978	0.053	1.017	0.059	0.835
YDR344C	0.048	0.982	0.048	1.056	0.05	0.789
YDR345C	0.043	1.037	0.051	1.011	0.051	0.812
YDR346C	0.045	1.018	0.046	1.008	0.049	0.785
YDR347W	0.045	0.756	0.043	0.681	0.044	0.318
YDR348C	0.044	0.877	0.048	1.001	0.05	0.636
YDR349C	0.05	1.02	0.052	1.031	0.054	0.864
YDR350C	0.043	0.795	0.046	0.728	0.046	0.421
YDR351W	0.047	1.01	0.054	0.995	0.046	0.455
YDR352W	0.045	0.96	0.051	1.006	0.047	0.571
YDR354W	0.043	0.906	0.043	0.943	0.045	0.535
YDR357C	0.044	0.932	0.043	0.973	0.046	0.701
YDR358W	0.041	0.976	0.045	1.014	0.047	0.623
YDR359C	0.043	0.304	0.042	0.246	0.041	0.143
YDR360W	0.042	0.838	0.046	0.862	0.044	0.603
YDR363W	0.051	0.752	0.052	0.76	0.047	0.277
YDR363W-A	0.039	0.665	0.039	0.626	0.04	0.606
YDR364C	0.047	0.897	0.049	0.857	0.048	0.634
YDR368W	0.046	0.966	0.048	0.963	0.051	0.544
YDR369C	0.044	0.353	0.048	0.205	0.048	0.123
YDR370C	0.046	0.978	0.052	0.982	0.05	0.589
YDR371W	0.044	0.967	0.046	1.018	0.046	0.642
YDR372C	0.042	0.892	0.047	0.982	0.045	0.564
YDR374C	0.042	0.917	0.05	0.958	0.049	0.419
YDR375C	0.042	0.783	0.043	0.683	0.044	0.207
YDR377W	0.042	0.849	0.044	0.876	0.043	0.365
YDR378C	0.04	0.206	0.045	0.211	0.044	0.138
YDR379c-A	0.04	0.874	0.04	0.451	0.038	0.392
YDR379W	0.04	0.902	0.045	0.914	0.041	0.334
YDR380W	0.04	0.93	0.043	0.942	0.046	0.419
YDR382W	0.042	0.89	0.045	0.902	0.048	0.515
YDR383C	0.041	0.934	0.045	0.951	0.047	0.363
YDR384C	0.043	0.938	0.046	1.063	0.043	0.575
YDR385W	0.039	0.755	0.045	0.841	0.043	0.339
YDR386W	0.04	0.761	0.048	0.856	0.043	0.227
YDR387C	0.042	0.941	0.046	1.014	0.041	0.272
YDR388W	0.041	0.363	0.046	0.368	0.041	0.162
YDR389W	0.056	0.931	0.068	0.996	0.061	0.74
YDR391C	0.05	0.936	0.055	0.912	0.056	0.434
YDR392W	0.048	0.36	0.051	0.369	0.052	0.302
YDR393W	0.051	0.792	0.055	0.683	0.056	0.278
YDR395W	0.049	0.886	0.052	0.873	0.053	0.454
YDR399W	0.049	0.865	0.05	0.865	0.05	0.239
YDR400W	0.051	0.994	0.056	1.012	0.053	0.444
YDR401W	0.047	0.969	0.053	0.978	0.052	0.532
YDR402C	0.045	0.932	0.047	0.907	0.05	0.447
YDR403W	0.043	0.886	0.045	0.882	0.048	0.435
YDR405W	0.044	0.746	0.042	0.561	0.047	0.2
YDR406W	0.045	0.918	0.048	0.993	0.051	0.502
YDR408C	0.042	0.785	0.044	0.844	0.046	0.269
YDR409W	0.042	0.905	0.046	1.015	0.045	0.472
YDR411C	0.043	0.915	0.048	0.993	0.043	0.338
YDR414C	0.042	0.791	0.045	0.789	0.045	0.561
YDR415C	0.041	0.936	0.043	0.916	0.045	0.515
YDR418W	0.043	0.333	0.044	0.362	0.048	0.306
YDR419W	0.042	0.962	0.053	0.998	0.049	0.692
YDR420W	0.041	0.93	0.043	0.867	0.045	0.536
YDR421W	0.041	0.882	0.044	0.92	0.044	0.286
YDR422C	0.042	0.877	0.044	0.907	0.042	0.344
YDR423C	0.044	0.941	0.046	0.921	0.043	0.29
YDR424C	0.046	0.858	0.043	0.485	0.043	0.623
YDR425W	0.047	0.927	0.047	0.885	0.046	0.337
YDR426C	0.047	0.946	0.05	0.951	0.049	0.369
YDR428C	0.047	0.983	0.047	0.986	0.05	0.422
YDR430C	0.046	0.927	0.045	0.99	0.049	0.555
YDR431W	0.044	0.888	0.042	0.777	0.049	0.625
YDR432W	0.046	0.239	0.043	0.173	0.047	0.171
YDR435C	0.046	0.875	0.046	0.755	0.046	0.307
YDR438W	0.045	0.946	0.046	0.885	0.052	0.732
YDR439W	0.047	0.572	0.047	0.394	0.051	0.273
YDR440W	0.048	0.969	0.05	0.9	0.05	0.798
YDR441C	0.044	0.931	0.045	0.894	0.048	0.746
YDR442W	0.045	0.704	0.04	0.237	0.043	0.166
YDR443C	0.044	0.468	0.043	0.452	0.044	0.467
YDR444W	0.046	0.905	0.043	0.772	0.04	0.544
YDR445C	0.052	0.926	0.049	0.408	0.05	0.373
YDR446W	0.042	0.918	0.042	0.848	0.045	0.766
YDR447C	0.04	0.675	0.041	0.632	0.045	0.712
YDR450W	0.044	0.494	0.047	0.567	0.051	0.574
YDR451C	0.045	0.879	0.045	0.818	0.05	0.633
YDR452W	0.043	0.95	0.042	0.826	0.047	0.711
YDR453C	0.041	0.911	0.043	0.794	0.045	0.584
YDR455C	0.039	0.837	0.04	0.711	0.044	0.631
YDR456W	0.039	0.806	0.041	0.766	0.042	0.542
YDR457W	0.039	0.761	0.04	0.703	0.044	0.664
YDR458C	0.039	0.906	0.04	0.762	0.042	0.591
YDR459C	0.037	0.703	0.039	0.669	0.041	0.416
YDR461W	0.05	0.924	0.044	0.784	0.044	0.514
YDR462W	0.041	0.643	0.044	0.482	0.045	0.451
YDR463W	0.05	0.277	0.046	0.078	0.05	0.068
YDR465C	0.044	0.954	0.044	0.739	0.047	0.518
YDR466W	0.043	0.91	0.043	0.695	0.045	0.482
YDR467C	0.042	0.904	0.043	0.655	0.044	0.439
YDR469W	0.04	0.503	0.041	0.33	0.043	0.207
YDR470C	0.04	0.567	0.042	0.399	0.046	0.244
YDR471W	0.039	0.358	0.04	0.284	0.042	0.402
YDR474C	0.041	0.889	0.046	0.822	0.044	0.501
YDR476C	0.039	0.896	0.04	0.749	0.043	0.525
YDR479C	0.04	0.92	0.042	0.765	0.045	0.606
YDR480W	0.039	0.863	0.042	0.765	0.043	0.464
YDR481C	0.039	0.886	0.04	0.655	0.043	0.525
YDR482C	0.038	0.865	0.04	0.722	0.042	0.649
YDR483W	0.04	0.748	0.039	0.637	0.041	0.338
YDR484W	0.039	0.708	0.039	0.634	0.042	0.215
YDR486C	0.037	0.802	0.044	0.663	0.043	0.544
YDR488C	0.051	0.863	0.05	0.587	0.058	0.301
YDR490C	0.049	0.914	0.05	0.555	0.055	0.562
YDR491C	0.049	0.913	0.051	0.751	0.056	0.664
YDR492W	0.051	0.971	0.053	0.901	0.058	0.62
YDR493W	0.048	0.932	0.054	0.932	0.043	0.721
YDR494W	0.048	0.873	0.047	0.711	0.05	0.583
YDR495C	0.045	0.223	0.048	0.147	0.048	0.132
YDR496C	0.045	0.489	0.048	0.34	0.046	0.425
YDR497C	0.045	0.394	0.046	0.263	0.047	0.138
YDR502C	0.043	0.989	0.045	0.821	0.039	0.415
YDR503C	0.041	0.917	0.043	0.773	0.047	0.568
YDR504C	0.04	0.914	0.043	0.816	0.048	0.666
YDR505C	0.04	0.905	0.043	0.867	0.046	0.75
YDR507C	0.04	0.194	0.041	0.171	0.043	0.201
YDR508C	0.04	0.894	0.042	0.875	0.043	0.838
YDR509W	0.04	0.89	0.042	0.947	0.042	0.787
YDR511W	0.041	0.971	0.045	0.83	0.051	0.75
YDR513W	0.045	0.975	0.046	0.811	0.047	0.629
YDR514C	0.043	0.957	0.042	0.72	0.045	0.568
YDR515W	0.046	0.938	0.041	0.643	0.038	0.263
YDR516C	0.064	0.997	0.047	0.846	0.046	0.792
YDR517W	0.04	0.919	0.044	0.712	0.047	0.578
YDR519W	0.039	0.637	0.039	0.452	0.041	0.255
YDR520C	0.04	0.729	0.042	0.443	0.042	0.305
YDR521W	0.039	0.739	0.04	0.536	0.042	0.268
YDR522C	0.044	0.962	0.05	0.898	0.045	0.434
YDR523C	0.049	1.015	0.046	0.801	0.048	0.737
YDR524C	0.044	0.971	0.042	0.669	0.045	0.395
YDR524c-B	0.04	0.042	0.035	0.053	0.04	0.047
YDR524w-A	0.049	0.931	0.052	0.974	0.054	0.748
YDR525W	0.044	0.871	0.044	0.363	0.045	0.122
YDR525W-A	0.044	0.91	0.04	0.843	0.042	0.684
YDR528W	0.041	0.842	0.041	0.573	0.043	0.324
YDR529C	0.041	0.558	0.04	0.269	0.043	0.156
YDR530C	0.045	0.908	0.044	0.732	0.045	0.521
YDR532C	0.041	0.046	0.041	0.048	0.04	0.05
YDR533C	0.043	0.294	0.042	0.297	0.043	0.215
YDR534C	0.046	0.99	0.044	0.834	0.044	0.381
YDR535C	0.046	0.927	0.041	0.885	0.043	0.798
YDR536W	0.043	0.91	0.041	0.854	0.044	0.745
YDR537C	0.042	0.753	0.049	0.542	0.047	0.146
YDR538W	0.048	0.949	0.045	0.907	0.046	0.74
YDR539W	0.046	0.936	0.041	0.903	0.041	0.714
YDR540C	0.042	0.803	0.04	0.753	0.041	0.763
YDR541C	0.044	0.882	0.041	0.838	0.043	0.616
YEL001C	0.051	1.004	0.051	1.012	0.055	1.016
YEL003W	0.049	0.984	0.05	0.726	0.045	0.473
YEL004W	0.044	0.98	0.048	0.983	0.043	0.916
YEL005C	0.045	0.994	0.043	0.994	0.042	0.937
YEL006W	0.046	0.988	0.046	0.99	0.043	0.932
YEL007W	0.045	0.37	0.047	0.617	0.043	0.84
YEL008W	0.046	0.996	0.043	0.964	0.045	0.957
YEL009C	0.046	1.013	0.041	0.974	0.046	0.961
YEL010W	0.042	1.007	0.046	0.98	0.043	0.898
YEL011W	0.043	0.864	0.04	0.549	0.043	0.581
YEL012W	0.049	0.875	0.049	0.786	0.044	0.311
YEL013W	0.046	1.025	0.046	0.985	0.05	1.015
YEL014C	0.042	1.006	0.042	0.989	0.039	0.771
YEL015W	0.043	1.001	0.041	0.965	0.039	0.647
YEL016C	0.041	0.988	0.042	1.014	0.04	0.797
YEL017C-A	0.043	0.988	0.044	1.069	0.04	0.905
YEL017W	0.043	1.001	0.042	0.983	0.04	0.867
YEL018W	0.041	0.987	0.042	0.986	0.04	0.858
YEL020C	0.045	0.996	0.037	0.877	0.039	0.809
YEL022W	0.042	0.888	0.044	0.906	0.041	0.456
YEL023C	0.045	0.998	0.037	0.921	0.042	0.973
YEL024W	0.042	0.387	0.044	0.341	0.043	0.128
YEL025C	0.041	1.014	0.045	1.008	0.041	0.852
YEL027W	0.041	0.178	0.041	0.125	0.04	0.08
YEL028W	0.043	1.006	0.043	0.973	0.041	0.912
YEL029C	0.043	1.017	0.043	0.977	0.043	0.983
YEL030W	0.043	1.008	0.043	1.013	0.043	0.958
YEL031W	0.042	0.733	0.04	0.582	0.041	0.613
YEL033W	0.039	0.389	0.04	0.224	0.041	0.338
YEL036C	0.038	0.333	0.04	0.221	0.042	0.14
YEL037C	0.037	0.98	0.039	0.971	0.039	0.711
YEL038W	0.039	0.99	0.038	0.96	0.04	0.763
YEL039C	0.038	1.028	0.04	0.975	0.038	0.829
YEL040W	0.042	1.008	0.041	1.016	0.042	0.92
YEL042W	0.042	0.943	0.043	0.912	0.04	0.869
YEL043W	0.044	0.983	0.042	1.014	0.04	0.98
YEL044W	0.038	0.193	0.037	0.091	0.044	0.09
YEL045C	0.039	0.052	0.038	0.043	0.043	0.057
YEL046C	0.039	0.071	0.037	0.043	0.039	0.055
YEL047C	0.044	1.01	0.041	0.934	0.046	0.929
YEL048C	0.048	0.99	0.053	0.975	0.049	0.866
YEL049W	0.045	1.007	0.05	0.975	0.046	0.774
YEL050C	0.048	0.54	0.049	0.488	0.047	0.328
YEL051W	0.044	0.119	0.045	0.099	0.045	0.07
YEL052W	0.046	1.01	0.05	0.991	0.047	0.805
YEL053C	0.049	0.961	0.052	0.907	0.053	0.755
YEL054C	0.052	0.705	0.053	0.694	0.055	0.768
YEL056W	0.045	0.999	0.044	0.89	0.049	0.877
YEL057C	0.045	0.996	0.041	0.829	0.046	0.766
YEL059c-A	0.038	0.878	0.039	0.635	0.037	0.336
YEL059W	0.04	0.996	0.043	0.973	0.04	0.755
YEL060C	0.04	0.958	0.042	0.958	0.04	0.741
YEL061C	0.04	0.775	0.042	0.747	0.041	0.429
YEL062W	0.042	0.497	0.042	0.37	0.041	0.246
YEL063C	0.044	0.981	0.044	0.961	0.043	0.803
YEL064C	0.044	0.992	0.045	0.986	0.042	0.91
YEL065W	0.044	0.984	0.045	0.988	0.043	0.904
YEL066W	0.042	0.975	0.041	0.952	0.041	0.882
YEL067C	0.042	0.988	0.041	0.975	0.041	0.814
YEL068C	0.042	1.017	0.04	0.913	0.041	0.839
YEL071W	0.044	0.979	0.045	0.952	0.042	1.002
YEL072W	0.04	0.994	0.043	0.976	0.041	0.962
YER001W	0.044	1	0.04	0.956	0.041	0.885
YER002W	0.041	0.973	0.037	0.623	0.039	0.828
YER004W	0.045	1.046	0.057	0.966	0.045	1.011
YER005W	0.044	0.971	0.051	0.915	0.043	0.955
YER007C-A	0.048	1.023	0.05	0.97	0.048	0.968
YER010C	0.047	1.01	0.046	0.975	0.044	0.943
YER011W	0.043	1.009	0.043	0.943	0.042	0.904
YER014C-A	0.044	0.045	0.039	0.042	0.046	0.044
YER015W	0.039	0.813	0.04	0.68	0.04	0.205
YER016W	0.049	0.805	0.042	0.432	0.054	0.525
YER017C	0.042	0.373	0.037	0.169	0.043	0.272
YER019C-A	0.042	1.053	0.039	0.854	0.045	0.825
YER019W	0.043	0.766	0.039	0.572	0.043	0.642
YER020W	0.042	1.019	0.038	0.773	0.044	0.822
YER024W	0.048	0.971	0.044	0.816	0.043	0.568
YER026C	0.039	0.045	0.041	0.05	0.04	0.042
YER027C	0.043	0.911	0.045	0.772	0.041	0.38
YER030W	0.042	1.043	0.038	0.809	0.044	0.877
YER031C	0.048	0.885	0.047	0.818	0.051	0.546
YER032W	0.039	0.999	0.037	0.865	0.042	0.831
YER033C	0.038	0.816	0.041	0.602	0.04	0.547
YER034W	0.038	0.85	0.036	0.62	0.042	0.58
YER037W	0.044	0.955	0.048	0.834	0.044	0.274
YER038W-A	0.041	1.109	0.039	0.595	0.046	0.653
YER039C	0.041	1.132	0.039	0.774	0.045	0.739
YER039C-A	0.044	0.9	0.041	0.869	0.042	0.723
YER040W	0.042	0.383	0.038	0.146	0.043	0.22
YER041W	0.04	1.154	0.038	0.543	0.044	0.614
YER042W	0.043	1.08	0.039	0.867	0.042	0.827
YER044C	0.04	0.045	0.038	0.042	0.04	0.042
YER044C-A	0.041	1.092	0.041	0.644	0.041	0.592
YER045C	0.04	1.078	0.039	0.768	0.04	0.684
YER046W	0.046	0.883	0.046	0.868	0.049	0.578
YER046W-A	0.042	0.904	0.036	0.643	0.046	0.804
YER047C	0.039	0.972	0.037	0.774	0.041	0.703
YER048C	0.04	1.021	0.037	0.774	0.044	0.788
YER049W	0.04	1.038	0.036	0.717	0.04	0.751
YER050C	0.04	0.382	0.036	0.176	0.042	0.265
YER051W	0.041	0.953	0.038	0.842	0.044	0.865
YER052C	0.04	0.962	0.038	0.683	0.043	0.724
YER053C	0.041	1.002	0.037	0.713	0.042	0.743
YER053c-A	0.038	0.659	0.037	0.466	0.036	0.354
YER054C	0.039	0.942	0.037	0.765	0.042	0.803
YER055C	0.04	0.924	0.039	0.705	0.039	0.604
YER056C	0.04	0.816	0.04	0.521	0.038	0.467
YER056C-A	0.04	0.885	0.046	0.614	0.044	0.596
YER057C	0.051	0.909	0.043	0.56	0.053	0.803
YER058W	0.049	0.771	0.043	0.536	0.046	0.457
YER059W	0.049	0.88	0.043	0.58	0.051	0.631
YER060W	0.046	0.982	0.042	0.747	0.048	0.733
YER060W-A	0.049	0.991	0.043	0.898	0.051	0.907
YER061C	0.046	0.478	0.041	0.255	0.05	0.487
YER062C	0.06	1.1	0.05	0.937	0.063	0.892
YER063W	0.044	0.816	0.043	0.771	0.044	0.303
YER064C	0.04	0.838	0.041	0.569	0.04	0.457
YER065C	0.044	1.073	0.04	0.757	0.043	0.722
YER066C-A	0.045	0.991	0.042	0.805	0.047	0.773
YER066W	0.048	0.841	0.045	0.828	0.047	0.34
YER067C-A	0.043	0.945	0.039	0.736	0.043	0.677
YER067W	0.043	0.927	0.039	0.665	0.044	0.689
YER068C-A	0.042	0.942	0.039	0.754	0.043	0.8
YER068W	0.042	0.06	0.039	0.043	0.042	0.044
YER069W	0.041	0.958	0.039	0.853	0.044	0.909
YER070W	0.041	0.05	0.039	0.04	0.043	0.044
YER071C	0.042	0.97	0.039	0.869	0.045	0.823
YER072W	0.04	0.533	0.038	0.302	0.04	0.32
YER073W	0.041	1.082	0.04	0.796	0.041	0.708
YER074W	0.041	0.558	0.044	0.334	0.04	0.295
YER075C	0.041	1.019	0.038	0.715	0.04	0.707
YER076C	0.039	0.865	0.039	0.716	0.039	0.439
YER077C	0.046	0.582	0.044	0.386	0.045	0.285
YER078C	0.045	0.933	0.044	0.641	0.056	0.716
YER079W	0.043	1.075	0.039	0.743	0.045	0.663
YER080W	0.041	1.106	0.038	0.88	0.042	0.843
YER081W	0.039	0.856	0.037	0.554	0.04	0.617
YER083C	0.04	0.181	0.037	0.072	0.042	0.081
YER084W	0.039	1.053	0.038	0.718	0.041	0.568
YER085C	0.039	1.053	0.037	0.733	0.038	0.557
YER086W	0.04	0.219	0.037	0.167	0.039	0.13
YER087C-A	0.042	1.129	0.04	0.781	0.041	0.654
YER087c-B	0.044	0.792	0.039	0.633	0.039	0.365
YER088C	0.043	0.844	0.04	0.454	0.042	0.561
YER089C	0.044	0.922	0.042	0.7	0.037	0.1
YER090W	0.046	0.85	0.04	0.643	0.045	0.714
YER091C	0.043	0.883	0.045	0.738	0.042	0.645
YER091C-A	0.045	0.867	0.043	0.875	0.044	0.719
YER092W	0.061	0.957	0.049	0.748	0.049	0.598
YER093C-A	0.042	0.919	0.039	0.506	0.047	0.715
YER095W	0.041	0.486	0.039	0.101	0.041	0.116
YER096W	0.041	0.942	0.04	0.658	0.041	0.675
YER097W	0.041	0.899	0.04	0.614	0.043	0.642
YER098W	0.043	0.917	0.038	0.561	0.04	0.717
YER099c	0.045	0.863	0.043	0.83	0.041	0.581
YER101C	0.053	0.892	0.05	0.799	0.05	0.581
YER103W	0.052	0.917	0.047	0.765	0.048	0.575
YER105c	0.045	0.9	0.043	0.84	0.04	0.376
YER106W	0.049	0.895	0.047	0.816	0.047	0.57
YER108C	0.05	0.856	0.046	0.775	0.049	0.619
YER110C	0.047	0.371	0.044	0.389	0.042	0.166
YER111C	0.053	0.655	0.046	0.552	0.055	0.425
YER113C	0.045	0.912	0.046	0.758	0.045	0.4
YER114C	0.045	0.858	0.043	0.802	0.043	0.397
YER115C	0.046	0.881	0.043	0.544	0.045	0.377
YER116C	0.044	0.133	0.044	0.134	0.044	0.133
YER117W	0.044	0.723	0.044	0.505	0.044	0.529
YER118C	0.044	0.838	0.042	0.576	0.042	0.298
YER119C	0.045	0.827	0.042	0.402	0.042	0.483
YER119C-A	0.043	0.571	0.042	0.411	0.041	0.413
YER120W	0.043	0.651	0.043	0.396	0.041	0.436
YER121W	0.044	0.804	0.046	0.713	0.044	0.498
YER122C	0.048	0.162	0.046	0.131	0.047	0.098
YER123W	0.045	0.622	0.045	0.404	0.045	0.299
YER124C	0.046	0.851	0.046	0.711	0.045	0.362
YER128W	0.044	0.879	0.045	0.575	0.044	0.353
YER129W	0.047	0.748	0.044	0.489	0.043	0.262
YER130C	0.048	0.864	0.042	0.39	0.043	0.339
YER131W	0.048	0.64	0.045	0.608	0.045	0.466
YER132C	0.045	0.834	0.047	0.611	0.043	0.426
YER134C	0.043	0.885	0.044	0.777	0.042	0.604
YER135C	0.042	0.873	0.046	0.756	0.055	0.516
YER137C	0.043	0.834	0.043	0.738	0.043	0.354
YER139C	0.045	0.424	0.043	0.399	0.045	0.304
YER140W	0.053	0.94	0.046	0.914	0.05	0.539
YER141W	0.043	0.643	0.042	0.389	0.042	0.374
YER142C	0.046	0.905	0.042	0.633	0.042	0.444
YER143W	0.046	0.862	0.043	0.467	0.042	0.308
YER144C	0.046	0.891	0.042	0.86	0.044	0.655
YER145C	0.046	0.827	0.043	0.417	0.043	0.227
YER149C	0.055	0.801	0.051	0.655	0.053	0.251
YER150W	0.055	0.829	0.051	0.689	0.053	0.335
YER151C	0.052	0.607	0.047	0.383	0.051	0.123
YER152C	0.053	0.881	0.049	0.623	0.051	0.397
YER153C	0.055	0.466	0.051	0.265	0.053	0.148
YER154W	0.056	0.474	0.052	0.414	0.052	0.218
YER156C	0.051	0.647	0.047	0.315	0.048	0.215
YER158C	0.046	0.81	0.044	0.756	0.045	0.399
YER161C	0.052	0.945	0.049	0.883	0.055	0.807
YER162C	0.053	0.925	0.049	0.803	0.048	0.595
YER163C	0.05	0.911	0.048	0.842	0.048	0.546
YER164W	0.049	0.895	0.048	0.791	0.048	0.461
YER166W	0.05	0.914	0.046	0.77	0.049	0.381
YER167W	0.047	0.832	0.045	0.656	0.046	0.543
YER169W	0.049	0.91	0.043	0.701	0.045	0.465
YER170W	0.047	0.908	0.043	0.732	0.046	0.468
YER173W	0.046	0.894	0.047	0.742	0.05	0.586
YER174C	0.044	0.909	0.043	0.819	0.048	0.593
YER175C	0.045	0.906	0.044	0.772	0.046	0.415
YER175w-A	0.049	0.858	0.046	0.231	0.057	0.499
YER176W	0.045	0.902	0.044	0.788	0.047	0.454
YER177W	0.046	0.775	0.044	0.395	0.046	0.185
YER178W	0.044	0.864	0.044	0.717	0.044	0.408
YER179W	0.047	0.915	0.046	0.758	0.046	0.462
YER180C	0.045	0.901	0.046	0.683	0.044	0.311
YER180c-A	0.045	0.047	0.043	0.046	0.041	0.048
YER181C	0.044	0.908	0.044	0.69	0.045	0.321
YER182W	0.044	0.848	0.041	0.579	0.04	0.311
YER183C	0.043	0.881	0.041	0.593	0.04	0.362
YER184C	0.044	0.769	0.04	0.426	0.04	0.304
YER185W	0.049	0.932	0.049	0.812	0.052	0.681
YER186C	0.049	0.897	0.046	0.799	0.047	0.47
YER186w-A	0.053	0.929	0.047	0.901	0.046	0.677
YER187W	0.05	0.907	0.047	0.803	0.051	0.484
YER188W	0.046	0.894	0.041	0.84	0.043	0.704
YFL001W	0.042	0.318	0.042	0.074	0.041	0.054
YFL003C	0.044	0.905	0.044	0.744	0.042	0.533
YFL004W	0.04	0.719	0.043	0.571	0.041	0.332
YFL006W	0.042	0.646	0.041	0.246	0.039	0.12
YFL007W	0.039	0.783	0.042	0.419	0.038	0.275
YFL010C	0.041	0.835	0.042	0.568	0.04	0.297
YFL011W	0.046	0.55	0.042	0.315	0.044	0.145
YFL012W	0.04	0.876	0.051	0.638	0.038	0.308
YFL013C	0.044	0.892	0.042	0.683	0.037	0.316
YFL013W-A	0.044	0.882	0.044	0.787	0.046	0.319
YFL014W	0.042	0.878	0.04	0.785	0.038	0.669
YFL015C	0.042	0.723	0.04	0.426	0.04	0.188
YFL016C	0.04	0.153	0.04	0.071	0.037	0.044
YFL018C	0.044	0.684	0.04	0.261	0.04	0.231
YFL019C	0.039	0.793	0.039	0.733	0.039	0.356
YFL020C	0.038	0.61	0.037	0.203	0.039	0.174
YFL021W	0.039	0.594	0.038	0.174	0.038	0.216
YFL023W	0.048	0.053	0.043	0.057	0.042	0.046
YFL025C	0.044	0.085	0.043	0.052	0.043	0.043
YFL027C	0.043	0.721	0.042	0.331	0.04	0.157
YFL028C	0.047	0.677	0.043	0.465	0.042	0.196
YFL030W	0.044	0.725	0.04	0.262	0.041	0.161
YFL032W	0.041	0.488	0.039	0.208	0.042	0.106
YFL034C-A	0.047	0.923	0.042	0.834	0.043	0.463
YFL034W	0.048	0.885	0.049	0.58	0.043	0.404
YFL035C-B	0.048	0.787	0.043	0.472	0.04	0.203
YFL036W	0.047	0.713	0.044	0.474	0.041	0.401
YFL040W	0.041	0.609	0.038	0.205	0.037	0.107
YFL041W	0.04	0.662	0.037	0.189	0.039	0.09
YFL041w-A	0.045	0.84	0.043	0.442	0.051	0.373
YFL043C	0.04	0.383	0.038	0.158	0.037	0.109
YFL044C	0.049	0.767	0.047	0.379	0.048	0.445
YFL046W	0.047	0.558	0.044	0.425	0.044	0.139
YFL047W	0.044	0.625	0.045	0.326	0.043	0.197
YFL048C	0.046	0.53	0.043	0.277	0.045	0.158
YFL049W	0.053	0.553	0.047	0.304	0.048	0.238
YFL050C	0.052	0.732	0.047	0.406	0.049	0.225
YFL051C	0.054	0.721	0.047	0.329	0.046	0.252
YFL052W	0.053	0.78	0.045	0.402	0.048	0.294
YFL053W	0.047	0.745	0.044	0.279	0.047	0.256
YFL054C	0.048	0.747	0.044	0.267	0.049	0.208
YFL055W	0.051	0.717	0.044	0.317	0.047	0.25
YFL056C	0.051	0.723	0.047	0.37	0.045	0.323
YFL063W	0.037	0.783	0.04	0.717	0.039	0.279
YFR001W	0.046	0.067	0.044	0.071	0.043	0.058
YFR006W	0.05	0.783	0.042	0.366	0.042	0.222
YFR007W	0.045	0.731	0.041	0.216	0.041	0.074
YFR008W	0.046	0.762	0.044	0.307	0.041	0.219
YFR009W	0.046	0.755	0.04	0.32	0.04	0.218
YFR010W	0.044	0.667	0.042	0.298	0.042	0.113
YFR011C	0.047	0.654	0.051	0.778	0.046	0.079
YFR012W	0.045	0.766	0.04	0.502	0.039	0.201
YFR012w-A	0.046	0.616	0.045	0.619	0.054	0.295
YFR013W	0.044	0.688	0.048	0.779	0.045	0.323
YFR014C	0.048	0.793	0.042	0.695	0.042	0.274
YFR015C	0.043	0.771	0.042	0.526	0.041	0.22
YFR016C	0.047	0.802	0.043	0.532	0.04	0.209
YFR017C	0.048	0.823	0.044	0.554	0.042	0.261
YFR018C	0.052	0.854	0.043	0.484	0.041	0.309
YFR019W	0.04	0.043	0.048	0.047	0.041	0.045
YFR020W	0.048	0.818	0.042	0.394	0.041	0.203
YFR021W	0.051	0.781	0.042	0.491	0.043	0.193
YFR022W	0.05	0.832	0.048	0.695	0.045	0.421
YFR023W	0.049	0.874	0.046	0.671	0.044	0.308
YFR024C	0.044	0.862	0.041	0.655	0.042	0.369
YFR024C-A	0.046	0.863	0.045	0.708	0.043	0.385
YFR025C	0.043	0.785	0.038	0.441	0.039	0.217
YFR026C	0.047	0.823	0.045	0.701	0.043	0.384
YFR030W	0.039	0.678	0.035	0.401	0.039	0.179
YFR031C-A	0.045	0.301	0.041	0.098	0.039	0.159
YFR032C	0.048	0.959	0.045	0.925	0.044	0.694
YFR032C-A	0.052	0.87	0.044	0.817	0.044	0.718
YFR032c-B	0.041	0.045	0.04	0.042	0.041	0.044
YFR033C	0.04	0.834	0.041	0.831	0.041	0.672
YFR034C	0.042	0.907	0.04	0.889	0.041	0.745
YFR035C	0.043	0.898	0.041	0.873	0.043	0.768
YFR036W	0.048	0.932	0.043	0.769	0.044	0.089
YFR039C	0.041	0.819	0.044	0.68	0.043	0.295
YFR040W	0.043	0.086	0.041	0.156	0.043	0.121
YFR041C	0.043	0.885	0.042	0.845	0.043	0.482
YFR043C	0.058	0.963	0.053	0.936	0.053	0.846
YFR044C	0.053	0.95	0.05	0.921	0.05	0.751
YFR046C	0.044	0.916	0.047	0.889	0.049	0.747
YFR047C	0.048	0.912	0.048	0.906	0.05	0.773
YFR048W	0.049	0.89	0.048	0.799	0.049	0.721
YFR049W	0.058	0.966	0.049	0.886	0.052	0.806
YFR053C	0.049	0.858	0.045	0.785	0.045	0.702
YFR054C	0.051	0.934	0.046	0.83	0.045	0.672
YFR055W	0.045	0.939	0.043	0.915	0.043	0.734
YFR056C	0.043	0.892	0.043	0.879	0.041	0.584
YFR057W	0.043	0.887	0.043	0.907	0.041	0.68
YGL002W	0.044	0.883	0.045	0.881	0.045	0.549
YGL003C	0.045	0.657	0.045	0.57	0.046	0.367
YGL004C	0.044	0.826	0.045	0.773	0.046	0.444
YGL005C	0.042	0.727	0.045	0.815	0.044	0.718
YGL006W	0.044	0.898	0.043	0.819	0.045	0.733
YGL006w-A	0.044	0.737	0.046	0.465	0.049	0.086
YGL007c-A	0.044	0.814	0.045	0.369	0.051	0.082
YGL007W	0.045	0.393	0.042	0.421	0.042	0.441
YGL009C	0.042	0.816	0.042	0.768	0.043	0.661
YGL010W	0.043	0.863	0.045	0.831	0.045	0.646
YGL012W	0.04	0.203	0.043	0.075	0.043	0.067
YGL013C	0.048	0.904	0.044	0.843	0.043	0.69
YGL014W	0.04	0.842	0.041	0.823	0.042	0.695
YGL015C	0.038	0.776	0.041	0.752	0.042	0.315
YGL016W	0.039	0.668	0.041	0.716	0.042	0.654
YGL017W	0.038	0.846	0.039	0.71	0.042	0.417
YGL019W	0.038	0.594	0.039	0.531	0.041	0.577
YGL020C	0.037	0.055	0.039	0.057	0.042	0.054
YGL021W	0.037	0.718	0.039	0.597	0.042	0.36
YGL025C	0.046	0.882	0.046	0.923	0.045	0.888
YGL026C	0.044	0.891	0.049	0.923	0.046	0.785
YGL027C	0.044	0.905	0.048	0.978	0.045	0.746
YGL028C	0.042	0.874	0.042	0.786	0.044	0.557
YGL031C	0.041	0.554	0.043	0.533	0.046	0.591
YGL034C	0.041	0.7	0.042	0.675	0.043	0.357
YGL035C	0.039	0.787	0.042	0.707	0.045	0.323
YGL036W	0.04	0.798	0.043	0.682	0.042	0.267
YGL037C	0.041	0.863	0.043	0.879	0.041	0.26
YGL038C	0.041	0.04	0.036	0.035	0.036	0.036
YGL039W	0.043	0.823	0.04	0.804	0.041	0.362
YGL041C	0.042	0.93	0.042	0.822	0.043	0.497
YGL041c-B	0.044	0.822	0.047	0.884	0.047	0.36
YGL042C	0.041	0.89	0.039	0.769	0.042	0.782
YGL043W	0.038	0.768	0.039	0.739	0.04	0.809
YGL046W	0.039	0.612	0.04	0.639	0.041	0.367
YGL049C	0.053	0.968	0.061	0.858	0.057	0.333
YGL050W	0.048	0.862	0.053	0.768	0.053	0.374
YGL051W	0.049	0.83	0.052	0.8	0.054	0.369
YGL053W	0.046	0.818	0.052	0.655	0.053	0.325
YGL054C	0.049	0.574	0.052	0.512	0.052	0.514
YGL056C	0.048	0.949	0.051	0.89	0.052	0.621
YGL057C	0.047	0.771	0.051	0.74	0.049	0.38
YGL058W	0.047	0.093	0.048	0.095	0.047	0.073
YGL059W	0.044	0.717	0.049	0.554	0.05	0.339
YGL060W	0.043	0.662	0.049	0.428	0.051	0.248
YGL062W	0.047	0.965	0.046	0.835	0.045	0.361
YGL063W	0.042	0.848	0.044	0.756	0.045	0.352
YGL064C	0.041	0.251	0.043	0.295	0.042	0.214
YGL066W	0.041	0.344	0.041	0.208	0.043	0.136
YGL067W	0.044	0.95	0.047	0.738	0.045	0.52
YGL070C	0.04	0.054	0.04	0.056	0.041	0.051
YGL071W	0.041	0.796	0.043	0.55	0.044	0.293
YGL072C	0.039	0.19	0.044	0.123	0.042	0.099
YGL076C	0.043	0.149	0.047	0.167	0.043	0.182
YGL077C	0.045	0.929	0.049	0.844	0.044	0.334
YGL078C	0.042	0.557	0.041	0.5	0.043	0.572
YGL079W	0.044	0.96	0.044	0.818	0.043	0.681
YGL080W	0.04	0.452	0.043	0.309	0.044	0.367
YGL082W	0.038	0.748	0.041	0.655	0.042	0.296
YGL083W	0.039	0.805	0.043	0.748	0.043	0.368
YGL084C	0.038	0.418	0.04	0.184	0.04	0.101
YGL085W	0.047	1.013	0.048	0.933	0.046	0.576
YGL086W	0.045	0.974	0.052	0.761	0.049	0.254
YGL087C	0.044	0.98	0.05	0.96	0.046	0.692
YGL088W	0.043	0.532	0.047	0.529	0.046	0.553
YGL089C	0.044	0.962	0.048	0.849	0.046	0.587
YGL090W	0.047	1.01	0.053	0.935	0.049	0.676
YGL094C	0.041	0.882	0.045	0.656	0.044	0.282
YGL095C	0.04	0.404	0.041	0.223	0.04	0.121
YGL096W	0.042	0.909	0.047	0.748	0.045	0.395
YGL100w	0.04	0.735	0.042	0.093	0.04	0.041
YGL105W	0.042	0.414	0.045	0.402	0.043	0.178
YGL107C	0.045	0.69	0.047	0.634	0.043	0.168
YGL108C	0.044	0.951	0.05	0.906	0.049	0.602
YGL109W	0.048	0.9	0.063	0.927	0.049	0.707
YGL110C	0.044	0.972	0.044	0.844	0.041	0.278
YGL114W	0.039	0.831	0.043	0.878	0.04	0.455
YGL115W	0.038	0.291	0.04	0.201	0.041	0.076
YGL117W	0.04	0.98	0.043	0.859	0.042	0.386
YGL118C	0.039	0.918	0.041	0.711	0.039	0.275
YGL119w	0.042	0.735	0.04	0.569	0.04	0.132
YGL121C	0.042	0.937	0.049	0.906	0.047	0.639
YGL124C	0.041	0.812	0.045	0.724	0.044	0.391
YGL126W	0.041	0.846	0.048	0.834	0.044	0.295
YGL127C	0.042	0.711	0.045	0.724	0.043	0.35
YGL129C	0.041	0.186	0.042	0.157	0.041	0.082
YGL131C	0.042	0.77	0.044	0.639	0.04	0.19
YGL132W	0.041	0.875	0.042	0.635	0.041	0.255
YGL133W	0.041	0.83	0.046	0.615	0.044	0.196
YGL134w	0.042	0.93	0.044	0.807	0.04	0.31
YGL135W	0.04	0.144	0.04	0.097	0.039	0.072
YGL136C	0.039	0.835	0.042	0.679	0.04	0.168
YGL138C	0.04	0.956	0.047	0.89	0.042	0.312
YGL139W	0.044	0.976	0.047	0.848	0.043	0.375
YGL140C	0.038	0.925	0.044	0.779	0.041	0.297
YGL141W	0.039	0.948	0.041	0.751	0.04	0.226
YGL143C	0.04	0.069	0.04	0.063	0.039	0.048
YGL144C	0.037	0.709	0.04	0.444	0.039	0.198
YGL146C	0.057	1.022	0.06	0.855	0.053	0.32
YGL147C	0.056	0.69	0.059	0.589	0.053	0.422
YGL148W	0.04	0.72	0.043	0.633	0.042	0.259
YGL149W	0.049	0.864	0.055	0.768	0.052	0.309
YGL151W	0.052	0.942	0.056	0.835	0.052	0.415
YGL152C	0.048	0.922	0.051	0.761	0.048	0.325
YGL153W	0.046	0.835	0.052	0.649	0.046	0.201
YGL154C	0.039	0.873	0.039	0.812	0.041	0.392
YGL156W	0.044	0.663	0.046	0.392	0.044	0.115
YGL157W	0.046	0.921	0.054	0.801	0.048	0.38
YGL158W	0.044	1.038	0.049	0.826	0.043	0.29
YGL159W	0.045	0.977	0.049	0.86	0.043	0.31
YGL160W	0.044	0.999	0.045	0.841	0.043	0.324
YGL161C	0.042	0.964	0.044	0.755	0.042	0.192
YGL162W	0.041	0.916	0.046	0.746	0.043	0.201
YGL163C	0.043	0.518	0.042	0.28	0.042	0.072
YGL164C	0.042	0.925	0.044	0.773	0.041	0.198
YGL165C	0.04	0.843	0.041	0.611	0.04	0.141
YGL166W	0.04	0.869	0.044	0.661	0.04	0.144
YGL167C	0.039	0.258	0.04	0.173	0.04	0.053
YGL168W	0.039	0.233	0.04	0.141	0.039	0.057
YGL170C	0.046	1.033	0.051	0.908	0.042	0.555
YGL173C	0.038	0.375	0.039	0.194	0.039	0.056
YGL175C	0.04	0.907	0.044	0.756	0.041	0.157
YGL176C	0.046	0.928	0.057	0.799	0.042	0.25
YGL177W	0.039	0.893	0.042	0.69	0.04	0.165
YGL178w	0.039	0.831	0.04	0.604	0.038	0.099
YGL179C	0.038	0.791	0.039	0.589	0.04	0.128
YGL180W	0.039	0.835	0.041	0.587	0.039	0.116
YGL181W	0.041	0.94	0.044	0.898	0.043	0.408
YGL184c	0.038	0.872	0.041	0.775	0.039	0.232
YGL185c	0.041	0.832	0.041	0.794	0.039	0.288
YGL186C	0.042	0.276	0.042	0.107	0.042	0.108
YGL188c-A	0.041	0.735	0.042	0.708	0.044	0.317
YGL190c	0.04	0.188	0.042	0.156	0.037	0.068
YGL191w	0.04	0.849	0.043	0.78	0.038	0.182
YGL192w	0.043	0.812	0.044	0.676	0.039	0.118
YGL194C	0.044	0.605	0.045	0.428	0.045	0.384
YGL195W	0.043	0.699	0.045	0.511	0.046	0.512
YGL197W	0.044	0.525	0.044	0.424	0.045	0.392
YGL198W	0.041	0.621	0.044	0.625	0.044	0.528
YGL200C	0.041	0.537	0.046	0.679	0.042	0.508
YGL203C	0.041	0.467	0.045	0.737	0.043	0.433
YGL205W	0.042	0.608	0.043	0.633	0.041	0.331
YGL206C	0.042	0.063	0.042	0.061	0.041	0.044
YGL208W	0.04	0.705	0.04	0.497	0.041	0.38
YGL209W	0.042	0.668	0.04	0.494	0.042	0.338
YGL210W	0.04	0.633	0.04	0.509	0.041	0.398
YGL212W	0.039	0.236	0.041	0.391	0.04	0.322
YGL213C	0.038	0.313	0.044	0.588	0.041	0.446
YGL214W	0.037	0.711	0.038	0.623	0.037	0.338
YGL215W	0.038	0.264	0.04	0.552	0.038	0.255
YGL217C	0.037	0.763	0.036	0.524	0.036	0.253
YGL219C	0.044	0.299	0.043	0.206	0.043	0.241
YGL220W	0.042	0.665	0.043	0.389	0.045	0.237
YGL221C	0.042	0.616	0.041	0.437	0.045	0.393
YGL222C	0.043	0.627	0.042	0.453	0.044	0.313
YGL223C	0.04	0.308	0.042	0.364	0.042	0.378
YGL226C-A	0.04	0.602	0.044	0.786	0.043	0.401
YGL226W	0.039	0.382	0.043	0.654	0.041	0.241
YGL227W	0.039	0.342	0.044	0.695	0.042	0.397
YGL228W	0.041	0.523	0.043	0.628	0.042	0.359
YGL229C	0.043	0.679	0.046	0.669	0.043	0.532
YGL230C	0.042	0.795	0.041	0.658	0.043	0.578
YGL231C	0.042	0.825	0.041	0.608	0.045	0.464
YGL232W	0.04	0.547	0.039	0.444	0.041	0.394
YGL234W	0.038	0.507	0.04	0.537	0.041	0.309
YGL236C	0.038	0.535	0.042	0.682	0.04	0.524
YGL240W	0.037	0.056	0.039	0.084	0.039	0.073
YGL241W	0.04	0.615	0.043	0.557	0.041	0.52
YGL242C	0.05	0.717	0.053	0.563	0.055	0.479
YGL243W	0.051	0.757	0.055	0.541	0.054	0.424
YGL244W	0.049	0.122	0.049	0.093	0.048	0.097
YGL246C	0.048	0.1	0.055	0.141	0.052	0.149
YGL248W	0.047	0.645	0.059	0.825	0.052	0.466
YGL249W	0.046	0.524	0.052	0.756	0.047	0.409
YGL250W	0.046	0.108	0.051	0.231	0.047	0.104
YGL251C	0.047	0.469	0.054	0.722	0.047	0.543
YGL252C	0.043	0.095	0.045	0.197	0.045	0.099
YGL253W	0.054	0.736	0.052	0.47	0.05	0.374
YGL254W	0.046	0.784	0.044	0.586	0.047	0.506
YGL255W	0.047	0.8	0.045	0.611	0.047	0.513
YGL256W	0.044	0.698	0.045	0.563	0.043	0.413
YGL257C	0.042	0.612	0.046	0.539	0.044	0.315
YGL258W	0.041	0.695	0.047	0.692	0.047	0.458
YGL259W	0.042	0.694	0.049	0.767	0.048	0.586
YGL260W	0.041	0.657	0.049	0.827	0.044	0.449
YGL261C	0.041	0.583	0.048	0.789	0.044	0.44
YGL262W	0.042	0.596	0.045	0.648	0.043	0.42
YGL263W	0.041	0.529	0.042	0.48	0.042	0.306
YGR001C	0.04	0.516	0.041	0.452	0.041	0.2
YGR003W	0.044	0.783	0.042	0.636	0.045	0.549
YGR004W	0.044	0.706	0.041	0.478	0.044	0.37
YGR006W	0.04	0.042	0.043	0.044	0.04	0.04
YGR007W	0.04	0.643	0.045	0.73	0.043	0.407
YGR008C	0.041	0.715	0.042	0.716	0.041	0.486
YGR010W	0.039	0.646	0.046	0.823	0.041	0.477
YGR012W	0.039	0.423	0.038	0.44	0.039	0.301
YGR014W	0.045	0.77	0.043	0.623	0.044	0.524
YGR015C	0.047	0.861	0.048	0.747	0.046	0.571
YGR016W	0.046	0.785	0.048	0.638	0.047	0.41
YGR017W	0.045	0.739	0.045	0.572	0.045	0.375
YGR019W	0.044	0.776	0.045	0.685	0.048	0.588
YGR020C	0.039	0.053	0.044	0.065	0.05	0.051
YGR021W	0.044	0.722	0.049	0.787	0.044	0.411
YGR023W	0.041	0.625	0.043	0.551	0.043	0.387
YGR026W	0.047	0.811	0.052	0.72	0.051	0.593
YGR027C	0.055	0.617	0.047	0.499	0.043	0.172
YGR028W	0.044	0.896	0.043	0.567	0.042	0.293
YGR031W	0.051	0.883	0.046	0.636	0.04	0.199
YGR032W	0.047	0.849	0.044	0.535	0.046	0.345
YGR033C	0.054	0.902	0.048	0.711	0.043	0.247
YGR034W	0.049	0.694	0.046	0.586	0.041	0.211
YGR035C	0.048	0.879	0.045	0.712	0.041	0.156
YGR035w-A	0.044	0.736	0.046	0.385	0.048	0.547
YGR036C	0.045	0.088	0.042	0.071	0.038	0.046
YGR038W	0.045	0.912	0.043	0.319	0.043	0.242
YGR039W	0.056	0.982	0.052	0.825	0.042	0.416
YGR040W	0.044	0.868	0.043	0.343	0.043	0.312
YGR041W	0.047	0.912	0.044	0.708	0.041	0.263
YGR042W	0.048	0.878	0.042	0.662	0.04	0.289
YGR043C	0.054	0.932	0.045	0.699	0.04	0.456
YGR044C	0.05	0.93	0.044	0.813	0.041	0.459
YGR045C	0.051	0.897	0.045	0.729	0.041	0.363
YGR049W	0.039	0.674	0.041	0.718	0.038	0.193
YGR050C	0.055	0.893	0.043	0.344	0.055	0.201
YGR051C	0.055	0.928	0.049	0.812	0.044	0.387
YGR052W	0.049	0.959	0.046	0.777	0.041	0.366
YGR053C	0.044	0.795	0.044	0.619	0.047	0.199
YGR054W	0.054	0.889	0.047	0.708	0.042	0.302
YGR055W	0.05	0.884	0.045	0.669	0.042	0.226
YGR056W	0.045	0.52	0.042	0.098	0.041	0.044
YGR057C	0.049	0.862	0.045	0.253	0.042	0.044
YGR058W	0.046	0.767	0.044	0.66	0.041	0.233
YGR059W	0.046	0.88	0.044	0.749	0.041	0.283
YGR061C	0.042	0.612	0.04	0.581	0.04	0.144
YGR063C	0.043	0.533	0.043	0.342	0.041	0.316
YGR064W	0.045	0.788	0.043	0.788	0.039	0.54
YGR066C	0.046	0.928	0.045	0.772	0.04	0.384
YGR067C	0.047	0.945	0.045	0.735	0.04	0.328
YGR068C	0.046	0.934	0.044	0.724	0.041	0.399
YGR069W	0.048	0.934	0.046	0.789	0.051	0.448
YGR070W	0.044	0.892	0.044	0.693	0.039	0.293
YGR071C	0.039	0.415	0.043	0.507	0.038	0.138
YGR072W	0.04	0.669	0.043	0.697	0.038	0.543
YGR076C	0.056	0.762	0.053	0.606	0.048	0.206
YGR077C	0.062	0.987	0.058	0.839	0.051	0.404
YGR078C	0.057	0.599	0.056	0.115	0.051	0.064
YGR079W	0.056	0.936	0.055	0.778	0.051	0.453
YGR080W	0.058	0.97	0.056	0.774	0.051	0.437
YGR081C	0.057	0.717	0.055	0.608	0.051	0.393
YGR084C	0.05	0.795	0.055	0.774	0.049	0.285
YGR085C	0.054	0.574	0.05	0.533	0.048	0.362
YGR086C	0.041	0.728	0.049	0.383	0.043	0.098
YGR087C	0.055	0.948	0.05	0.778	0.043	0.258
YGR088W	0.054	0.945	0.048	0.804	0.044	0.333
YGR089W	0.042	0.794	0.045	0.425	0.038	0.264
YGR092W	0.041	0.129	0.044	0.065	0.04	0.044
YGR093W	0.045	0.832	0.045	0.33	0.044	0.36
YGR096W	0.047	0.903	0.046	0.758	0.039	0.241
YGR097W	0.047	0.867	0.045	0.826	0.041	0.634
YGR100W	0.049	0.865	0.047	0.778	0.042	0.257
YGR101W	0.046	0.263	0.043	0.205	0.042	0.103
YGR102C	0.047	0.508	0.044	0.378	0.041	0.146
YGR104C	0.045	0.263	0.042	0.216	0.04	0.084
YGR105W	0.049	0.074	0.041	0.055	0.039	0.043
YGR106C	0.042	0.652	0.046	0.129	0.039	0.065
YGR107W	0.046	0.831	0.043	0.725	0.04	0.28
YGR108W	0.043	0.76	0.043	0.738	0.041	0.284
YGR109C	0.046	0.843	0.043	0.753	0.04	0.28
YGR110W	0.045	0.842	0.045	0.252	0.043	0.223
YGR111W	0.062	1.003	0.056	0.856	0.049	0.496
YGR112W	0.048	0.55	0.047	0.418	0.043	0.12
YGR117C	0.043	0.782	0.043	0.264	0.047	0.184
YGR118W	0.057	0.705	0.048	0.592	0.045	0.433
YGR121C	0.05	0.861	0.047	0.729	0.042	0.328
YGR121w-A	0.046	0.926	0.041	0.472	0.052	0.625
YGR122C-A	0.043	0.908	0.042	0.727	0.037	0.191
YGR122W	0.05	0.882	0.055	0.786	0.044	0.401
YGR123C	0.046	0.797	0.043	0.584	0.046	0.434
YGR124W	0.044	0.839	0.043	0.688	0.043	0.397
YGR125W	0.046	0.843	0.042	0.619	0.043	0.362
YGR126W	0.044	0.794	0.042	0.57	0.042	0.256
YGR127W	0.045	0.82	0.041	0.611	0.043	0.368
YGR129W	0.049	0.898	0.043	0.679	0.043	0.531
YGR130C	0.043	0.872	0.041	0.726	0.043	0.519
YGR131W	0.044	0.898	0.041	0.723	0.042	0.392
YGR132C	0.043	0.865	0.042	0.645	0.045	0.491
YGR133W	0.044	0.833	0.043	0.671	0.043	0.506
YGR134W	0.041	0.81	0.04	0.463	0.042	0.655
YGR135W	0.045	0.675	0.045	0.396	0.042	0.167
YGR136W	0.05	0.95	0.045	0.668	0.041	0.555
YGR137W	0.046	0.878	0.041	0.599	0.04	0.447
YGR138C	0.044	0.819	0.042	0.676	0.039	0.379
YGR139W	0.048	0.895	0.043	0.705	0.04	0.409
YGR141W	0.044	0.817	0.042	0.63	0.04	0.397
YGR142W	0.045	0.869	0.041	0.698	0.04	0.416
YGR143W	0.042	0.833	0.04	0.598	0.04	0.171
YGR144W	0.047	0.913	0.04	0.744	0.039	0.532
YGR146C	0.047	0.94	0.041	0.712	0.041	0.474
YGR146c-A	0.044	0.922	0.041	0.35	0.049	0.617
YGR148C	0.044	0.696	0.042	0.595	0.041	0.4
YGR149W	0.044	0.806	0.043	0.67	0.041	0.218
YGR150C	0.045	0.633	0.042	0.406	0.042	0.168
YGR151C	0.044	0.766	0.04	0.594	0.041	0.283
YGR152C	0.048	0.834	0.041	0.764	0.042	0.467
YGR153W	0.047	0.894	0.042	0.781	0.043	0.502
YGR154C	0.045	0.835	0.041	0.742	0.042	0.336
YGR155W	0.044	0.053	0.048	0.051	0.043	0.044
YGR157W	0.045	0.643	0.042	0.647	0.043	0.262
YGR159C	0.046	0.178	0.041	0.137	0.04	0.111
YGR160W	0.043	0.228	0.04	0.15	0.041	0.102
YGR161C	0.044	0.859	0.041	0.722	0.04	0.227
YGR161W-C	0.038	0.832	0.035	0.435	0.039	0.401
YGR162W	0.047	0.186	0.046	0.092	0.039	0.118
YGR163W	0.044	0.802	0.043	0.365	0.042	0.09
YGR164W	0.04	0.662	0.042	0.343	0.042	0.109
YGR165W	0.046	0.306	0.041	0.16	0.042	0.116
YGR166W	0.044	0.849	0.04	0.724	0.04	0.455
YGR167W	0.041	0.742	0.039	0.597	0.039	0.182
YGR168C	0.042	0.748	0.042	0.586	0.041	0.22
YGR169C	0.043	0.783	0.04	0.631	0.039	0.22
YGR169c-A	0.041	0.903	0.038	0.351	0.044	0.437
YGR170W	0.042	0.738	0.04	0.627	0.039	0.185
YGR171C	0.054	0.726	0.052	0.537	0.05	0.161
YGR173W	0.053	0.838	0.05	0.697	0.048	0.242
YGR174C	0.051	0.761	0.048	0.575	0.047	0.154
YGR174w-A	0.041	0.768	0.039	0.368	0.044	0.7
YGR176W	0.053	0.886	0.051	0.703	0.05	0.466
YGR177C	0.049	0.865	0.05	0.754	0.05	0.509
YGR178C	0.049	0.774	0.047	0.632	0.048	0.352
YGR180C	0.047	0.642	0.045	0.586	0.043	0.289
YGR181W	0.047	0.84	0.044	0.674	0.045	0.291
YGR182C	0.05	0.885	0.047	0.715	0.048	0.274
YGR183C	0.05	0.943	0.046	0.771	0.044	0.406
YGR184C	0.057	0.821	0.045	0.62	0.042	0.258
YGR187C	0.046	0.793	0.044	0.513	0.04	0.263
YGR188C	0.047	0.387	0.046	0.395	0.043	0.086
YGR189C	0.046	0.834	0.044	0.527	0.039	0.317
YGR192C	0.046	0.771	0.042	0.433	0.043	0.146
YGR193C	0.046	0.925	0.042	0.784	0.041	0.586
YGR194C	0.046	0.904	0.043	0.658	0.039	0.335
YGR196C	0.047	0.844	0.041	0.745	0.043	0.307
YGR197C	0.048	0.855	0.04	0.74	0.041	0.211
YGR199W	0.044	0.831	0.04	0.631	0.04	0.277
YGR200C	0.043	0.525	0.039	0.276	0.039	0.209
YGR201C	0.043	0.913	0.044	0.821	0.043	0.298
YGR202C	0.043	0.839	0.04	0.676	0.04	0.269
YGR203W	0.043	0.866	0.04	0.67	0.042	0.37
YGR204c-A	0.043	0.903	0.04	0.672	0.046	0.554
YGR204W	0.042	0.796	0.042	0.585	0.044	0.084
YGR205W	0.044	0.843	0.039	0.623	0.04	0.208
YGR206W	0.045	0.915	0.04	0.751	0.04	0.313
YGR207C	0.056	0.963	0.048	0.861	0.044	0.53
YGR208W	0.049	0.057	0.045	0.048	0.044	0.042
YGR209C	0.054	0.965	0.045	0.801	0.045	0.423
YGR210C	0.042	0.884	0.04	0.678	0.04	0.667
YGR212W	0.05	0.917	0.043	0.727	0.043	0.444
YGR213C	0.054	0.88	0.042	0.646	0.044	0.413
YGR214W	0.051	0.588	0.043	0.498	0.046	0.411
YGR215W	0.045	0.384	0.042	0.201	0.043	0.129
YGR217W	0.047	0.893	0.041	0.57	0.042	0.403
YGR219W	0.041	0.564	0.041	0.548	0.04	0.208
YGR220C	0.041	0.538	0.041	0.546	0.041	0.404
YGR221C	0.049	0.939	0.043	0.893	0.043	0.773
YGR222W	0.053	0.561	0.042	0.277	0.044	0.207
YGR223C	0.049	0.919	0.043	0.548	0.044	0.572
YGR224W	0.044	0.845	0.042	0.857	0.044	0.713
YGR226C	0.045	0.858	0.043	0.839	0.044	0.707
YGR227W	0.047	0.893	0.043	0.856	0.045	0.703
YGR228W	0.051	0.928	0.047	0.857	0.045	0.602
YGR229C	0.045	0.777	0.042	0.467	0.041	0.137
YGR230W	0.045	0.929	0.049	0.931	0.047	0.82
YGR231C	0.043	0.889	0.045	0.876	0.043	0.735
YGR232W	0.042	0.924	0.042	0.9	0.04	0.809
YGR233C	0.042	0.839	0.042	0.725	0.04	0.661
YGR234W	0.048	0.96	0.041	0.896	0.042	0.816
YGR235C	0.046	0.942	0.04	0.835	0.041	0.708
YGR236C	0.042	0.894	0.04	0.829	0.042	0.692
YGR237C	0.041	0.763	0.04	0.759	0.041	0.559
YGR238C	0.048	0.834	0.045	0.448	0.045	0.183
YGR239C	0.044	0.808	0.044	0.723	0.042	0.287
YGR240C	0.051	0.69	0.044	0.491	0.048	0.265
YGR241C	0.051	0.96	0.045	0.946	0.047	0.79
YGR242W	0.045	0.929	0.043	0.927	0.043	0.771
YGR243W	0.043	0.917	0.043	0.898	0.044	0.737
YGR247W	0.057	0.96	0.043	0.887	0.045	0.752
YGR248W	0.04	0.788	0.047	0.737	0.042	0.301
YGR249W	0.046	0.919	0.042	0.9	0.046	0.785
YGR250C	0.044	0.785	0.045	0.688	0.043	0.338
YGR252W	0.041	0.333	0.041	0.082	0.039	0.045
YGR254W	0.04	0.829	0.04	0.678	0.038	0.089
YGR255C	0.04	0.386	0.04	0.144	0.036	0.139
YGR256W	0.046	0.923	0.048	0.915	0.041	0.692
YGR257C	0.038	0.122	0.041	0.1	0.035	0.054
YGR258C	0.043	0.931	0.04	0.809	0.038	0.576
YGR259C	0.047	0.861	0.049	0.9	0.044	0.55
YGR260W	0.049	0.904	0.055	0.933	0.047	0.861
YGR261C	0.043	0.216	0.05	0.574	0.05	0.448
YGR262C	0.04	0.049	0.043	0.055	0.044	0.064
YGR263C	0.045	0.846	0.049	0.918	0.05	0.87
YGR266W	0.043	0.952	0.046	0.955	0.042	0.69
YGR268C	0.041	0.914	0.045	0.945	0.04	0.68
YGR269W	0.045	0.966	0.048	0.968	0.042	0.724
YGR270W	0.045	0.922	0.047	0.916	0.041	0.511
YGR271c-A	0.043	0.933	0.047	0.899	0.047	0.601
YGR271W	0.048	0.949	0.04	0.844	0.037	0.657
YGR272C	0.043	0.066	0.047	0.096	0.036	0.077
YGR273C	0.044	0.889	0.04	0.675	0.036	0.244
YGR275W	0.045	0.955	0.048	0.969	0.052	0.951
YGR276C	0.042	0.794	0.039	0.477	0.036	0.077
YGR279C	0.047	0.951	0.05	0.958	0.045	0.811
YGR281W	0.045	0.887	0.045	0.922	0.04	0.431
YGR282C	0.045	0.93	0.049	0.932	0.041	0.721
YGR283C	0.051	0.93	0.055	0.945	0.044	0.785
YGR284C	0.048	0.954	0.049	0.935	0.046	0.799
YGR285C	0.043	0.163	0.048	0.216	0.048	0.202
YGR286C	0.047	0.959	0.052	0.94	0.051	0.874
YGR287C	0.045	0.93	0.048	0.93	0.052	0.916
YGR288W	0.043	0.955	0.05	0.906	0.054	0.909
YGR289C	0.046	0.756	0.04	0.367	0.038	0.167
YGR290W	0.046	0.963	0.046	0.951	0.041	0.459
YGR291C	0.042	0.859	0.04	0.723	0.036	0.151
YGR292W	0.042	0.82	0.04	0.649	0.038	0.107
YGR295C	0.045	0.867	0.049	0.853	0.048	0.614
YHL001W	0.041	0.679	0.045	0.631	0.053	0.393
YHL002W	0.042	0.923	0.041	0.821	0.047	0.297
YHL003C	0.043	1.013	0.04	0.569	0.036	0.115
YHL004W	0.041	0.261	0.041	0.388	0.049	0.11
YHL005C	0.038	0.754	0.037	0.322	0.035	0.084
YHL006C	0.037	0.961	0.036	0.632	0.037	0.159
YHL007C	0.038	0.856	0.037	0.274	0.036	0.076
YHL008C	0.038	0.942	0.036	0.595	0.036	0.143
YHL009C	0.036	0.708	0.034	0.159	0.035	0.057
YHL010C	0.037	0.984	0.035	0.697	0.035	0.147
YHL011C	0.044	0.198	0.043	0.156	0.044	0.119
YHL012W	0.036	0.944	0.037	0.632	0.038	0.164
YHL013C	0.037	0.947	0.036	0.58	0.036	0.173
YHL014C	0.038	0.909	0.037	0.6	0.036	0.144
YHL015w-A	0.045	0.934	0.048	0.856	0.049	0.607
YHL016C	0.041	1.031	0.04	0.74	0.038	0.236
YHL017W	0.043	0.99	0.04	0.695	0.038	0.221
YHL019C	0.038	0.868	0.037	0.642	0.038	0.128
YHL020C	0.039	0.785	0.038	0.349	0.037	0.058
YHL021C	0.041	0.946	0.037	0.74	0.037	0.14
YHL022C	0.037	0.934	0.037	0.728	0.036	0.152
YHL023C	0.039	0.063	0.038	0.08	0.04	0.094
YHL024W	0.042	0.908	0.042	0.731	0.042	0.727
YHL025W	0.044	0.059	0.044	0.047	0.041	0.043
YHL026C	0.042	1.016	0.039	0.571	0.041	0.15
YHL027W	0.044	1.042	0.039	0.705	0.041	0.245
YHL028W	0.045	1.028	0.039	0.952	0.037	0.407
YHL029C	0.038	0.976	0.036	0.54	0.038	0.099
YHL030W	0.041	1.005	0.037	0.612	0.037	0.183
YHL031C	0.038	0.754	0.037	0.211	0.037	0.066
YHL032C	0.038	0.956	0.038	0.604	0.038	0.2
YHL033C	0.039	0.588	0.037	0.32	0.037	0.186
YHL034C	0.038	0.776	0.037	0.585	0.037	0.214
YHL035C	0.038	0.945	0.037	0.597	0.037	0.148
YHL036W	0.042	1.05	0.04	0.806	0.042	0.396
YHL037C	0.042	1.054	0.038	0.747	0.038	0.134
YHL038C	0.046	0.891	0.038	0.306	0.038	0.076
YHL039W	0.041	0.914	0.042	0.825	0.042	0.319
YHL040C	0.042	1.033	0.04	0.831	0.04	0.28
YHL041W	0.042	1.013	0.041	0.812	0.038	0.308
YHL042W	0.039	1.03	0.043	0.954	0.039	0.318
YHL043W	0.04	1.023	0.046	0.994	0.04	0.369
YHL044W	0.04	1.011	0.047	1.021	0.04	0.635
YHL045W	0.039	1.024	0.043	0.886	0.039	0.275
YHL046C	0.041	1.032	0.042	0.897	0.037	0.301
YHL047C	0.04	1.01	0.041	0.867	0.039	0.275
YHR001W	0.04	0.374	0.042	0.456	0.046	0.137
YHR001W-A	0.043	0.969	0.041	0.552	0.044	0.218
YHR003C	0.043	0.838	0.048	0.841	0.041	0.573
YHR004C	0.052	0.836	0.047	0.738	0.045	0.198
YHR005C	0.047	0.866	0.047	0.837	0.043	0.247
YHR006W	0.045	0.903	0.045	0.837	0.04	0.111
YHR007c-A	0.042	0.825	0.042	0.839	0.044	0.666
YHR008C	0.041	0.047	0.043	0.047	0.041	0.044
YHR009C	0.045	0.882	0.046	0.797	0.043	0.235
YHR010W	0.04	0.146	0.044	0.176	0.04	0.079
YHR011W	0.042	0.197	0.05	0.312	0.038	0.052
YHR012W	0.041	0.783	0.038	0.465	0.038	0.103
YHR013C	0.043	0.591	0.039	0.163	0.038	0.052
YHR014W	0.04	0.953	0.038	0.803	0.037	0.125
YHR015W	0.041	0.943	0.038	0.662	0.038	0.103
YHR016C	0.043	0.879	0.044	0.55	0.041	0.517
YHR017W	0.043	0.826	0.042	0.264	0.041	0.508
YHR018C	0.041	0.985	0.038	0.614	0.038	0.123
YHR021C	0.048	0.662	0.044	0.38	0.039	0.07
YHR021W-A	0.049	0.965	0.066	0.968	0.045	0.732
YHR022C	0.041	0.997	0.056	1.025	0.044	0.649
YHR022c-A	0.043	0.885	0.04	0.873	0.043	0.39
YHR025W	0.045	0.487	0.043	0.622	0.044	0.151
YHR026W	0.043	0.085	0.044	0.073	0.042	0.047
YHR028C	0.044	1.033	0.038	0.667	0.035	0.156
YHR029C	0.039	1.028	0.036	0.694	0.036	0.117
YHR030C	0.041	0.799	0.036	0.155	0.037	0.045
YHR031C	0.043	1.002	0.039	0.606	0.037	0.177
YHR032W	0.044	0.929	0.041	0.385	0.043	0.68
YHR033W	0.048	1.017	0.039	0.798	0.036	0.233
YHR034C	0.051	0.827	0.044	0.555	0.041	0.194
YHR035W	0.045	1.047	0.054	1.058	0.04	0.37
YHR037W	0.053	1.032	0.097	1.018	0.048	0.782
YHR038W	0.051	0.697	0.038	0.2	0.038	0.048
YHR039C	0.051	1.045	0.039	0.74	0.037	0.101
YHR039C-B	0.038	0.06	0.041	0.075	0.038	0.056
YHR041C	0.041	0.192	0.043	0.228	0.042	0.168
YHR043C	0.046	1.053	0.041	0.949	0.039	0.291
YHR044C	0.049	1.038	0.069	1.084	0.043	0.559
YHR045W	0.042	0.868	0.04	0.491	0.039	0.499
YHR046C	0.042	0.851	0.044	0.737	0.047	0.499
YHR047C	0.044	0.863	0.048	0.783	0.046	0.512
YHR048W	0.042	0.869	0.048	0.794	0.047	0.446
YHR049C-A	0.044	0.864	0.043	0.718	0.046	0.619
YHR049W	0.043	0.804	0.043	0.625	0.043	0.301
YHR050W	0.042	0.802	0.043	0.704	0.045	0.537
YHR050w-A	0.041	0.825	0.043	0.724	0.042	0.199
YHR051W	0.046	0.228	0.044	0.134	0.048	0.108
YHR057C	0.042	0.82	0.043	0.758	0.041	0.503
YHR059W	0.044	0.106	0.045	0.106	0.041	0.051
YHR060W	0.037	0.038	0.038	0.039	0.037	0.038
YHR061C	0.041	0.846	0.042	0.791	0.042	0.559
YHR063C	0.043	0.719	0.045	0.794	0.051	0.396
YHR064C	0.045	0.363	0.044	0.233	0.043	0.333
YHR066W	0.042	0.546	0.042	0.347	0.043	0.404
YHR067W	0.043	0.861	0.043	0.814	0.039	0.113
YHR071W	0.041	0.717	0.042	0.739	0.049	0.391
YHR073W	0.041	0.815	0.039	0.8	0.041	0.463
YHR075C	0.043	0.823	0.039	0.755	0.043	0.226
YHR076W	0.042	0.752	0.04	0.664	0.042	0.187
YHR077C	0.043	0.839	0.039	0.711	0.043	0.678
YHR078W	0.043	0.828	0.039	0.501	0.042	0.261
YHR079C	0.044	0.851	0.04	0.672	0.044	0.453
YHR079C-B	0.041	0.908	0.044	0.891	0.042	0.697
YHR080C	0.05	0.888	0.042	0.737	0.047	0.652
YHR081W	0.042	0.145	0.04	0.12	0.041	0.134
YHR082C	0.043	0.808	0.041	0.678	0.042	0.244
YHR086W	0.043	0.78	0.042	0.864	0.044	0.474
YHR086w-A	0.042	0.899	0.038	0.436	0.047	0.406
YHR087W	0.041	0.777	0.043	0.8	0.043	0.224
YHR090C	0.039	0.045	0.038	0.044	0.043	0.045
YHR091c	0.047	0.146	0.04	0.102	0.043	0.077
YHR092C	0.044	0.824	0.043	0.807	0.043	0.454
YHR093W	0.052	0.887	0.051	0.724	0.053	0.479
YHR094C	0.048	0.889	0.048	0.721	0.049	0.368
YHR095W	0.046	0.879	0.048	0.77	0.049	0.422
YHR096C	0.044	0.768	0.048	0.754	0.052	0.401
YHR097C	0.045	0.778	0.047	0.726	0.05	0.407
YHR098C	0.039	0.724	0.038	0.249	0.043	0.238
YHR100C	0.045	0.441	0.044	0.485	0.044	0.183
YHR103W	0.044	0.824	0.044	0.453	0.044	0.179
YHR104W	0.045	0.779	0.043	0.674	0.045	0.448
YHR105W	0.044	0.831	0.04	0.805	0.045	0.467
[truncated: 2,876 more rows]
