# Supplementary material for: Molecular insight into arsenic toxicity via the genome-wide deletion mutant screening of Saccharomyces cerevisiae
Source: Royal Society of Chemistry journal article supplement (doi:10.1039/c5mt00261c), 2015-12-02
Supplement: c5mt00261c2.xlsx [file c5mt00261c2.xlsx]

## Sheet: Sheet1
Systematic name	Standard name	Description
YLR113W	HOG1	Mitogen-activated protein kinase involved in osmoregulation; controls global reallocation of RNAPII in osmotic shock; activates CDC28 by stimulating antisense RNA transcription; mediates recruitment/activation of RNAPII at Hot1p-dependent promoters; with Mrc1p defines novel S-phase checkpoint that prevent conflicts between DNA replication and transcription; nuclear form represses pseudohyphal gro…
YJL128C	PBS2	MAP kinase kinase of the HOG signaling pathway; activated under severe osmotic stress; mitophagy-specific regulator; plays a role in regulating Ty1 transposition
YLR006C	SSK1	Cytoplasmic phosphorelay intermediate osmosensor and regulator; part of a two-component signal transducer that mediates osmosensing via a phosphorelay mechanism; required for mitophagy; dephosphorylated form is degraded by the ubiquitin-proteasome system; potential Cdc28p substrate
YMR275C	BUL1	Ubiquitin-binding component of the Rsp5p E3-ubiquitin ligase complex
YDR181C	SAS4	Subunit of the SAS complex; acetylates free histones and nucleosomes and regulates transcriptional silencing
YML007W	YAP1	Basic leucine zipper (bZIP) transcription factor; required for oxidative stress tolerance; activated by H2O2 through the multistep formation of disulfide bonds and transit from the cytoplasm to the nucleus; mediates resistance to cadmium; relative distribution to the nucleus increases upon DNA replication stress
YGR057C	LST7	Protein possibly involved in a post-Golgi secretory pathway; required for the transport of nitrogen-regulated amino acid permease Gap1p from the Golgi to the cell surface
YJL179W	PFD1	Subunit of heterohexameric prefoldin; involved in the biogenesis of actin and of alpha- and gamma-tubulin
YGL100W	SEH1	Subunit of the Nup84 nuclear pore and SEACAT subcomplexes; SEA is a coatomer-related complex that associates dynamically with the vacuole; human SEH1 homolog
YJL120W		Partially overlaps the verified gene YJL121C/RPE1; deletion confers sensitivity to GSAO
YKL176C	LST4	Protein possibly involved in a post-Golgi secretory pathway; required for the transport of nitrogen-regulated amino acid permease Gap1p from the Golgi to the cell surface
YPR201W	ARR3	Plasma membrane metalloid/H+ antiporter; member of bile/arsenite/riboflavin transporter (BART) superfamily; transports arsenite and antimonite; required for resistance to arsenic compounds; transcription is activated by Arr1p in the presence of arsenite
YBR126C	TPS1	Synthase subunit of trehalose-6-P synthase/phosphatase complex: expression is induced by the stress response and repressed by the Ras-cAMP pathway
YOL081W	IRA2	GTPase-activating protein; negatively regulates RAS by converting it from the GTP- to the GDP-bound inactive form
YPR199C	ARR1	Transcriptional activator of the basic leucine zipper (bZIP) family; required for transcription of genes involved in resistance to arsenic compounds
YNL229C	URE2	Nitrogen catabolite repression transcriptional regulator; has glutathione peroxidase activity and can mutate to acquire GST activity; altered form creates [URE3] prion
YBR069C	TAT1	Amino acid transporter for valine, leucine, isoleucine, and tyrosine; low-affinity tryptophan and histidine transporter
YHL009C	YAP3	Basic leucine zipper (bZIP) transcription factor
YNR031C	SSK2	MAP kinase kinase kinase of HOG1 mitogen-activated signaling pathway; interacts with Ssk1p, leading to autophosphorylation and activation of Ssk2p which phosphorylates Pbs2p; also mediates actin cytoskeleton recovery from osmotic stress; a HOG-independent function of Ssk2p mediates the calcium-sensitive phenotype of the ptp2 msg5 double disruptant; SSK2 has a paralog, SSK22, that arose from the w…
YDL020C	RPN4	Transcription factor that stimulates expression of proteasome genes; RPN4 is transcriptionally regulated by various stress responses
YGR078C	PAC10	Part of the heteromeric co-chaperone GimC/prefoldin complex; complex promotes efficient protein folding
YDL066W	IDP1	Mitochondrial NADP-specific isocitrate dehydrogenase; catalyzes the oxidation of isocitrate to alpha-ketoglutarate
YOR350C	MNE1	Protein involved in splicing Group I aI5-beta intron from COX1 mRNA; mitochondrial matrix protein
YDR149C		Dubious open reading frame; overlaps the verified gene NUM1/YDR150W; null mutation blocks anaerobic growth
YOR265W	RBL2	Protein involved in microtubule morphogenesis
YGL012W	ERG4	C-24(28) sterol reductase; catalyzes the final step in ergosterol biosynthesis
YPR123C		Dubious open reading frame; partially/completely overlaps the verified ORF CTR
YLR087C	CSF1	Protein required for fermentation at low temperature; plays a role in the maturation of secretory proteins
YLR268W	SEC22	R-SNARE protein; assembles into SNARE complex with Bet1p, Bos1p and Sed5p; cycles between the ER and Golgi complex; involved in anterograde and retrograde transport between the ER and Golgi
YJL062W	LAS21	Integral plasma membrane protein; involved in the synthesis of the glycosylphosphatidylinositol (GPI) core structure; mutations affect cell wall integrity
YER007W	PAC2	Microtubule effector required for tubulin heterodimer formation
YDL021W	GPM2	Homolog of Gpm1p phosphoglycerate mutase; converts 3-phosphoglycerate to 2-phosphoglycerate in glycolysis
YOR258W	HNT3	DNA 5' AMP hydrolase involved in DNA repair; member of the histidine triad (HIT) superfamily of nucleotide-binding proteins
YDL069C	CBS1	Mitochondrial translational activator of the COB mRNA
YPL241C	CIN2	GTPase-activating protein (GAP) for Cin4p; tubulin folding factor C involved in beta-tubulin (Tub2p) folding
YLR200W	YKE2	Subunit of the heterohexameric Gim/prefoldin protein complex; involved in the folding of alpha-tubulin, beta-tubulin, and actin
YML124C	TUB3	Alpha-tubulin; associates with beta-tubulin (Tub2p) to form tubulin dimer, which polymerizes to form microtubules
YDR463W	STP1	Transcription factor; undergoes proteolytic processing by SPS (Ssy1p-Ptr3p-Ssy5p)-sensor component Ssy5p in response to extracellular amino acids; activates transcription of amino acid permease genes
YHR030C	SLT2	Serine/threonine MAP kinase; involved in regulating maintenance of cell wall integrity, cell cycle progression, and nuclear mRNA retention in heat shock; required for mitophagy and pexophagy; affects recruitment of mitochondria to phagophore assembly site (PAS); plays a role in adaptive response of cells to cold; regulated by the PKC1-mediated signaling pathway; SLT2 has a paralog, KDX1, that aro…
YDR448W	ADA2	Transcription coactivator; component of the ADA and SAGA transcriptional adaptor/HAT (histone acetyltransferase) complexes
YGR056W	RSC1	Component of the RSC chromatin remodeling complex; required for expression of mid-late sporulation-specific genes
YLR372W	ELO3	involved in fatty acid and sphingolipid biosynthesis
YOR383C	FIT3	Mannoprotein that is incorporated into the cell wall; incorporated via a glycosylphosphatidylinositol (GPI) anchor; involved in the retention of siderophore-iron in the cell wall
YDL037C	BSC1	Protein of unconfirmed function; similar to cell surface flocculin Flo11p
YDR176W	NGG1	Subunit of chromatin modifying histone acetyltransferase complexes; member of the ADA complex, the SAGA complex, and the SLIK complex; transcriptional regulator involved in glucose repression of Gal4p-regulated genes
YBL024W	NCL1	increases proportion of tRNALeu(CAA) with m5C at wobble position in response to hydrogen peroxide, causing selective translation of mRNA from genes enriched in TTG codon; loss of NCL1 confers hypersensitivity to oxidative stress; similar to Nop2p and human proliferation associated nucleolar protein p120
YFL041W	FET5	Multicopper oxidase; integral membrane protein with similarity to Fet3p; may have a role in iron transport
YJR073C	OPI3	Methylene-fatty-acyl-phospholipid synthase; catalyzes the last two steps in phosphatidylcholine biosynthesis
YDR028C	REG1	Inactivates Snf1p
YMR294W	JNM1	Component of the yeast dynactin complex; required for proper nuclear migration and spindle partitioning during mitotic anaphase B
YFL001W	DEG1	tRNA:pseudouridine synthase
YAL024C	LTE1	Protein similar to GDP/GTP exchange factors
YML041C	VPS71	Nucleosome-binding component of the SWR1 complex; required for vacuolar protein sorting
YAL012W	CYS3	Cystathionine gamma-lyase; catalyzes one of the two reactions involved in the transsulfuration pathway that yields cysteine from homocysteine
YBR164C	ARL1	Soluble GTPase with a role in regulation of membrane traffic; regulates potassium influx; role in membrane organization at trans-Golgi network
YDL057W		Putative protein of unknown function; YDL057W is not an essential gene
YDR525W	API2	Dubious open reading frame; unlikely to encode a functional protein, based on available experimental and comparative sequence data; not conserved in closely related Saccharomyces species; 26% of ORF overlaps the dubious ORF YDR524C-A; insertion mutation in a cdc34-2 mutant background causes altered bud morphology
YDR074W	TPS2	Phosphatase subunit of the trehalose-6-P synthase/phosphatase complex
YDL051W	LHP1	RNA binding protein required for maturation of tRNA and U6 snRNA
YPL269W	KAR9	Karyogamy protein; required for correct positioning of the mitotic spindle and for orienting cytoplasmic microtubules
YBL031W	SHE1	Mitotic spindle protein, inhibits dynein function
YOR382W	FIT2	Mannoprotein that is incorporated into the cell wall; incorporated via a glycosylphosphatidylinositol (GPI) anchor; involved in the retention of siderophore-iron in the cell wall
YAL011W	SWC3	component of the SWR1 complex
YDR485C	VPS72	Htz1p-binding component of the SWR1 complex; required for vacuolar protein sorting
YDL076C	RXT3	Component of the Rpd3L histone deacetylase complex
YLL040C	VPS13	Protein involved in prospore membrane morphogenesis; vacuolar protein sorting
YOR360C	PDE2	High-affinity cyclic AMP phosphodiesterase; component of the cAMP-dependent protein kinase signaling system
YML117W	NAB6	Putative RNA-binding protein; associates with mRNAs encoding cell wall proteins in high-throughput studies; deletion mutants display increased sensitivity to some cell wall disrupting agents; expression negatively regulated by cAMP
YDL052C	SLC1	1-acyl-sn-glycerol-3-phosphate acyltransferase; catalyzes the acylation of lysophosphatidic acid to form phosphatidic acid, a key intermediate in lipid metabolism; enzymatic activity detected in lipid particles and microsomes
YOR338W		Putative protein of unknown function; YOR338W transcription is regulated by Azf1p and its transcript is a specific target of the G protein effector Scp160p; identified as being required for sporulation in a high-throughput mutant screen; YOR338W has a paralog, FUN19, that arose from the whole genome duplication
YDL050C		Dubious open reading frame; unlikely to encode a functional protein, based on available experimental and comparative sequence data
YHR154W	RTT107	Protein implicated in Mms22-dependent DNA repair during S phase;
YPR070W	MED1	Subunit of the RNA polymerase II mediator complex; associates with core polymerase subunits to form the RNA polymerase II holoenzyme; essential for transcriptional regulation
YBR298C	MAL31	Maltose permease; high-affinity maltose transporter (alpha-glucoside transporter); encoded in the MAL3 complex locus; member of the 12 transmembrane domain superfamily of sugar transporters;
YOR291W	YPK9	Vacuolar protein with a possible role in sequestering heavy metals; homolog of human ATP13A2 (PARK9), mutations in which are associated with Parkinson disease and Kufor-Rakeb syndrome
