# Supplementary material for: Molecular insight into arsenic toxicity via the genome-wide deletion mutant screening of Saccharomyces cerevisiae
Source: Royal Society of Chemistry journal article supplement (doi:10.1039/c5mt00261c), 2015-12-02
Supplement: c5mt00261c3.xlsx [file c5mt00261c3.xlsx]

## Sheet: Sheet1
Systematic name	Standard name	Description
YBR189W	RPS9B	Protein component of the small (40S) ribosomal subunit
YMR143W	RPS16A	Protein component of the small (40S) ribosomal subunit
YLL044W		Dubious open reading frame
YCR031C	RPS14A	Protein component of the small (40S) ribosomal subunit
YDR450W	RPS18A	Protein component of the small (40S) ribosomal subunit
YFR032C-A	RPL29	Ribosomal 60S subunit protein L29
YIL014C-A		Putative protein of unknown function
YLR444C		Dubious open reading frame
YJR014W	TMA22	Protein of unknown function; associates with ribosomes and has a putative RNA binding domain
YLL043W	FPS1	Aquaglyceroporin, plasma membrane channel; involved in efflux of glycerol and xylitol, and in uptake of acetic acid and the trivalent metalloids arsenite and antimonite
YLR111W		Dubious open reading frame
YML063W	RPS1B	Ribosomal protein 10 (rp10) of the small (40S) subunit
YJL136C	RPS21B	Protein component of the small (40S) ribosomal subunit
YMR269W	TMA23	Nucleolar protein implicated in ribosome biogenesis
YLR264W	RPS28B	Protein component of the small (40S) ribosomal subunit
YLR185W	RPL37A	Ribosomal 60S subunit protein L37A
YGL088W		Dubious open reading frame
YLR448W	RPL6B	Ribosomal 60S subunit protein L6B; binds 5.8S rRNA
YLR388W	RPS29A	Protein component of the small (40S) ribosomal subunit
YPR043W	RPL43A	Ribosomal 60S subunit protein L43A
YNL069C	RPL16B	Ribosomal 60S subunit protein L16B
YDR417C		Dubious open reading frame
YDL061C	RPS29B	Protein component of the small (40S) ribosomal subunit
YDR447C	RPS17B	Ribosomal protein 51 (rp51) of the small (40s) subunit
YLR402W		Dubious open reading frame
YMR142C	RPL13B	Ribosomal 60S subunit protein L13B
YDR500C	RPL37B	Ribosomal 60S subunit protein L37B
YCR063W	BUD31	Component of the SF3b subcomplex of the U2 snRNP; increases efficiency of first and second step pre-mRNA splicing
YLR367W	RPS22B	Protein component of the small (40S) ribosomal subunit
YLR184W		Dubious open reading frame
YML009C-A		Dubious open reading frame
YGR097W	ASK10	Regulator of the Fps1p glycerol channel; under nonstress conditions, binds to Fps1p to positively regulate glycerol transport; under osmotic stress, multiple phosphorylation by Hog1p causes Ask10p to dissociate from Fps1p
YPL249C-A	RPL36B	Ribosomal 60S subunit protein L36B
YIL008W	URM1	Ubiquitin-like protein involved in thiolation of cytoplasmic tRNAs; receives sulfur from the E1-like enzyme Uba4p and transfers it to tRNA; also functions as a protein tag with roles in nutrient sensing and oxidative stress response
YGL019W	CKB1	Beta regulatory subunit of casein kinase 2 (CK2); a Ser/Thr protein kinase with roles in cell growth and proliferation
YOR039W	CKB2	Beta' regulatory subunit of casein kinase 2 (CK2); a Ser/Thr protein kinase with roles in cell growth and proliferation
YDL194W	SNF3	Plasma membrane low glucose sensor, regulates glucose transport; contains 12 predicted transmembrane segments and a long C-terminal tail required for induction of hexose transporters
YFR034C	PHO4	Basic helix-loop-helix (bHLH) transcription factor of the myc-family; activates transcription cooperatively with Pho2p in response to phosphate limitation
YGR233C	PHO81	Cyclin-dependent kinase (CDK) inhibitor; regulates Pho80p-Pho85p and Pcl7p-Pho85p cyclin-CDK complexes in response to phosphate levels
